1 **Title:**

2

3 Oligodendrocyte precursor cells engulf synaptic inputs in an experience- and microglia-  
4 dependent manner

5

6 **Authors:**

7

8 Yohan S.S. Auguste<sup>1</sup>, Austin Ferro<sup>1</sup>, Jessica Dixon<sup>1</sup>, Uma Vrudhula<sup>1</sup>, Jessica Kahng<sup>1,2</sup>,  
9 Anne-Sarah Nichitiu<sup>1</sup>, and Lucas Cheadle<sup>1\*</sup>

10

11 **Affiliations:**

12

13 1 Cold Spring Harbor Laboratory, Cold Spring Harbor, NY, USA

14 2 School of Biological Sciences, Cold Spring Harbor Laboratory, Cold Spring Harbor, NY,  
15 USA

16

17 **Correspondence:**

18

19 Cheadle@cshl.edu

20

21 **Abstract:**

22

23 Oligodendrocyte precursor cells (OPCs) are a highly proliferative class of non-neuronal  
24 progenitors that largely give rise to myelinating oligodendrocytes. Although OPCs persist  
25 across the lifespan, their functions beyond oligodendrogenesis remain to be fully  
26 characterized. Here, we show that OPCs contribute to neural circuit remodeling by  
27 internalizing presynaptic thalamocortical inputs in both the developing and adult mouse  
28 visual cortex. Inputs internalized by OPCs localize to lysosomal compartments, consistent  
29 with OPC engulfment of synapses occurring through phagocytosis. We further show that  
30 engulfment by OPCs is heightened during experience-dependent plasticity, and that this  
31 experience-dependent increase in engulfment requires microglia. These data identify a  
32 new function for OPCs beyond the generation of oligodendrocytes and reveal that distinct  
33 non-neuronal populations collaborate to modulate synaptic connectivity.

34

35

36 **Manuscript:**

37

38 The refinement of synapses in response to sensory experience sculpts brain  
39 connectivity during late stages of postnatal development and facilitates neural circuit  
40 plasticity in the adult<sup>1</sup>. However, the cellular and molecular mechanisms underlying  
41 experience-dependent refinement remain poorly understood. Recent work demonstrates  
42 that microglia and astrocytes, prominent populations of non-neuronal brain cells  
43 collectively called glia, promote synaptic refinement in the mammalian visual system by  
44 eliminating excess synapses prior to the onset of sensory experience at eye-opening,  
45 which occurs around postnatal days (P)12 – P14<sup>2,3</sup>. Astrocytes and microglia  
46 predominantly eliminate synapses during this time by phagocytosing (i.e. eating) synaptic

47 components and digesting them within acidic lysosomal compartments. While these  
48 paradigm-shifting discoveries unveiled synapse engulfment by glia as a core biological  
49 mechanism through which non-neuronal cells shape circuit connectivity and function early  
50 in life, the possibility that glia serve as intermediaries between visual experience and  
51 synaptic refinement during late stages of development and in the adult remained to be  
52 extensively tested.

53  
54 Oligodendrocyte precursor cells (OPCs) are a specialized population of glial  
55 progenitors in the brain that give rise to myelinating oligodendrocytes, cells that promote  
56 communication between neurons by wrapping their axons in myelin sheaths<sup>4</sup>. Initially  
57 born in the subventricular zones of the embryonic neural tube, OPCs migrate throughout  
58 the brain and spinal cord where they continue to proliferate and differentiate into  
59 oligodendrocytes, and less frequently other cell types, well into postnatal development<sup>5,6</sup>.  
60 Although the rate of oligodendrocyte production by OPCs decreases significantly as the  
61 brain matures, OPCs remain abundant and maintain their multipotent capacity in the adult  
62 brain. OPCs also dynamically respond to a variety of cues, including neuronal activity and  
63 molecular signals from microglia, by differentiating into oligodendrocytes and thereby  
64 increasing the production of myelin<sup>7,8</sup>. OPCs also receive direct synaptic input from  
65 neurons, though the functions of OPC:neuron synapses remain to be defined<sup>9,10</sup>. In  
66 addition to their ability to form synaptic connections, the persistence of OPCs across the  
67 lifespan even after mature myelination patterns have been established suggests that  
68 OPCs may play important roles in the brain beyond their contributions as an adult  
69 progenitor pool. However, such alternative functions have yet to be extensively  
70 characterized.

71  
72 To uncover experience-dependent mechanisms of synaptic refinement in the  
73 postnatal brain, we analyzed interactions between non-neuronal cells including OPCs and  
74 presynaptic thalamocortical (TC) inputs from the dorsal lateral geniculate nucleus (dLGN)  
75 of the thalamus as they synapse onto their postsynaptic targets in layer 4 of the primary  
76 visual cortex (V1) of the mouse. We chose the visual TC circuit as the basis for this study  
77 because it undergoes a well-defined period of heightened experience-dependent synaptic  
78 development during the third week of life, and because synapse elimination in the adult  
79 contributes to vision-dependent plasticity<sup>11,12</sup> (Fig. 1A). We first assessed interactions  
80 between glia and synapses across postnatal development and in the mature brain by  
81 immunostaining for proteins enriched in distinct non-neuronal cell types along with the TC  
82 input marker Vglut2 at postnatal days (P)10 (prior to eye-opening), P20 (the beginning of  
83 the critical period of sensory-dependent remodeling), P27 (the peak of sensory-  
84 dependent remodeling), and P90, when the brain is fully mature. By quantifying these  
85 interactions using a well-established engulfment assay<sup>13</sup>, we identified TC inputs within  
86 microglia at all time points analyzed, confirming that microglia engulf synapses in V1 as  
87 the brain matures.

88  
89 Unexpectedly, although microglia are considered to be the primary phagocytes of  
90 the brain, we observed that OPCs not only contained TC inputs within their cellular  
91 boundaries, but that they contained more Vglut2+ inputs compared to microglia at all  
92 developmental time points analyzed, and the same level of inputs in the adult (Fig. 1B-

93 D). Initially focusing on the P90 time point, we complemented the antibody-based method  
94 for labeling presynaptic terminals *ex vivo* by labeling TC inputs *in vivo* through infection  
95 of neurons in the dLGN with AAV9-hSYN-eGFP (Extended Data Fig. 1A). This experiment  
96 confirmed the presence of GFP+ structures within OPCs in V1 (Fig. 1E). Reciprocally, we  
97 labeled OPCs *in vivo* by crossing the NG2-CreER<sup>T2</sup> mouse line<sup>14</sup> with the Lox-STOP-Lox-  
98 TdTomato reporter line (NG2-CreER<sup>T2</sup>; TdTomato mice; Extended Data Fig. 1B-F), and  
99 immunostained V1 sections from these mice for Vglut2. This analysis confirmed the  
100 presence of Vglut2+ TC inputs within the boundaries of TdTomato+ OPCs (Fig. 1F).

101  
102 Next, to determine whether OPCs express the molecular machinery necessary to  
103 engulf synapses, we assessed the expression of a number of genes encoding known  
104 mediators of phagocytosis and lysosomal function both by re-analyzing a published  
105 single-cell RNA-sequencing dataset from adult mouse V1<sup>15</sup> and through multiplexed  
106 fluorescence *in situ* hybridization (RNAscope). Relevant genes were taken from the  
107 “phagocytosis” gene ontology term from the PANTHER database<sup>16</sup>. These analyses  
108 confirmed that OPCs express molecular regulators of engulfment, including *Ptprj*, *Calcr1*,  
109 *Mertk*, and *Arsb* (Extended Data Figure 2). Altogether, these data provide evidence that  
110 OPCs engulf presynaptic terminals in the mammalian neocortex.

111  
112 Because imaging interactions between OPCs and synapses in sections *ex vivo*  
113 requires tissue fixation and permeabilization which can sometimes obscure structural  
114 interactions, we next sought to visualize synapses within OPCs in the living brain. Toward  
115 this end we again infected the dLGNs of adult NG2-CreER<sup>T2</sup>; TdTomato mice with AAV9-  
116 hSYN-eGFP then imaged interactions between OPCs and TC inputs in layers 3 and 4 of  
117 V1 in awake mice by two-photon microscopy (Extended Data Fig. 3A). First, we captured  
118 single-timepoint volumes of V1 containing TdTomato+ OPCs interacting with GFP+ TC  
119 inputs, and quantified the number of synaptic inputs that interacted with each OPC in the  
120 field of view. Consistent with previous reports that OPCs receive synaptic input from  
121 neurons<sup>9,10</sup>, we found that every OPC was in direct contact with at least one eGFP+ TC  
122 input, and that each OPC interacted with  $16.5 \pm 2.85$  inputs on average (Fig. 1G and  
123 Extended Data Fig. 3B-E). Furthermore, we observed that a large majority (88.5%) of  
124 OPCs contained eGFP+ material within their cellular boundaries.

125  
126 To further explore interactions between OPCs and TC inputs, we next separated  
127 synaptic inputs into three categories based upon their proximity to the OPC surface:  
128 inputs that did not contact OPCs (non-contacting), inputs that contacted OPCs, and inputs  
129 that were internalized by OPCs (i.e. those that were at least 270 nm internal to the OPC  
130 surface). This analysis revealed that inputs in direct contact with the OPC surface were  
131 significantly larger than non-contacting inputs as well as internalized inputs (Fig. 1H), and  
132 that internalized inputs were smaller than both contacting and non-contacting terminals  
133 (Extended Data Fig. 3F). This observation is consistent with the engulfed inputs  
134 representing synaptic components that may be undergoing digestion.

135  
136 To determine the short-term stability of inputs engulfed by OPCs, we next  
137 performed time-lapse volumetric imaging of interactions between TC inputs and OPCs  
138 over a 30-minute period of time in V1 of awake, unanesthetized mice (Supplemental

139 Movies 1 and 2). These data revealed that inputs engulfed by OPCs remained small and  
140 relatively stable across this time frame, though in rare cases we observed an input that  
141 was initially within an OPC but disappeared during the imaging period, again suggesting  
142 the possibility that internalized inputs are being digested (Fig. 1I,J). These data suggest  
143 that OPCs engulf TC inputs *in vivo*.

144

145 Synaptic components engulfed through phagocytosis are shuttled into acidic  
146 lysosomal compartments for digestion, as evidenced by a strong colocalization of  
147 synaptic inputs inside of microglia with markers of lysosomal membranes<sup>2</sup>. To determine  
148 the fate of TC inputs engulfed by OPCs, we immunostained the brains of NG2-CreER<sup>T2</sup>;  
149 TdTomato mice for Vglut2 and the late-lysosomal membrane protein Lamp2. Using  
150 standard confocal microscopy, we observed a substantial population of engulfed inputs  
151 that resided within Lamp2+ lysosomes, consistent with OPCs eliminating inputs through  
152 engulfment, similar to microglia. We also observed a population of internalized inputs that  
153 did not colocalize with Lamp2 and may represent structures that are at different stages of  
154 endosomal processing, or that interact with OPCs through a non-endocytic mechanism  
155 (Fig. 2A). Super-resolution Structured Illumination Microscopy (SIM) of V1 sections from  
156 NG2-CreER<sup>T2</sup>; TdTomato mice infected with AAV9-hSYN-eGFP and stained for Lamp2  
157 confirmed the presence of engulfed synapses within OPC lysosomes (Fig. 2B).

158

159 To assess the localization of internalized inputs by another strategy, we generated  
160 a fluorescent reporter of lysosomal digestion in which the presynaptic protein  
161 Synaptophysin is fused to mCherry and eGFP. Because eGFP fluorescence (but not  
162 mCherry fluorescence) is substantially quenched in acidic environments, this viral  
163 construct, which we named AAV5-hSYN-pSynDig (probe for Synaptic Digestion), allowed  
164 us to simultaneously visualize lysosome-associated inputs (mCherry+; GFP-) and inputs  
165 outside of lysosomes (mCherry+; GFP+)(Fig. 2C,D and Extended Data Fig. 4)<sup>17</sup>. We  
166 observed both GFP+ and GFP- inputs within OPCs both by standard confocal and super-  
167 resolution microscopy (Fig. 2E-G), confirming that a substantial number of inputs engulfed  
168 by OPCs localize to acidic compartments that are likely to represent lysosomes. In  
169 combination with our finding that presynaptic components within OPCs are smaller than  
170 those that remain unengulfed, these data suggest that OPCs engulf and digest  
171 presynaptic TC terminals in V1.

172

173 While initially focusing our analysis on synapse engulfment by OPCs in the mature  
174 brain, the observation that OPCs and microglia also engulf synapses at P20 (the  
175 beginning of the critical period of sensory-dependent refinement) and P27 (the height of  
176 sensory-dependent refinement) suggested that one or both of these cell types may  
177 contribute to the elimination of synapses in response to experience during late postnatal  
178 development. To assess this possibility, we subjected mice to a sensory deprivation and  
179 stimulation paradigm in which mice are reared in complete darkness between P20 and  
180 P27 (late-dark-rearing, LDR) then acutely re-exposed to light for ten hours (LDR+10; Fig.  
181 3A). This is a widely used paradigm that effectively activates robust patterns of sensory-  
182 driven neural activity in the dLGN and V1<sup>18,19</sup>. We found that, while microglia do not  
183 change their level of engulfment as a result of sensory deprivation or stimulation  
184 (Extended Data Fig. 5), the distribution of structural contacts between microglia and



185 OPCs shifted toward the distal ends of the OPC arbor in dark-reared mice, then returned  
186 to normal following light re-exposure (Fig. 3B,C). This result led us to hypothesize that  
187 sensory experience may coordinate signaling interactions between microglia and OPCs,  
188 some of which may be contact-dependent, to influence OPC-mediated synapse  
189 engulfment.

190

191 To test this hypothesis, we took advantage of PLX5622, an inhibitor of Colony  
192 Stimulating Factor Receptor 1 that, when administered to mice, depletes microglia from  
193 the brain almost entirely within three days of beginning administration (Extended Data  
194 Fig. 6). We found that depletion of microglia in normally reared mice between P20 and  
195 P27 significantly decreased the amount of synaptic material found within OPCs (Fig.  
196 3D,E). Furthermore, whereas microglial engulfment was not altered by changes in  
197 sensory experience, synapse engulfment by OPCs in control mice was significantly  
198 heightened following light re-exposure after dark-rearing. Remarkably, this experience-  
199 dependent increase in OPC-mediated engulfment was dampened in the absence of  
200 microglia, indicating that sensory experience and microglia converge to promote the  
201 OPC-mediated engulfment of TC inputs (Fig. 3F,G). In addition to an overall increase in  
202 engulfment, analysis of the distribution of discrete sites of engulfment across the highly  
203 complex OPC arbor revealed a sensory-driven shift in engulfment sites toward the more  
204 distal regions of OPC processes. This shift occurred in response to either sensory  
205 deprivation or stimulation, suggesting that bidirectional manipulations of experience may  
206 position OPCs to eliminate synapses across a broader cortical volume (Extended Data  
207 Fig. 7). Altogether, these data demonstrate that OPCs engulf synaptic inputs in response  
208 to sensory experience during a critical period of sensory-dependent plasticity, and that  
209 microglia provide signals to OPCs to promote their engulfment of synapses in an  
210 experience-dependent manner.

211

212 Despite a growing number of studies describing the roles of glia in synaptic  
213 refinement in the early postnatal brain, how non-neuronal cells remodel synaptic  
214 connectivity during later experience-dependent phases of development and in the adult  
215 remains an area of active investigation<sup>20,21</sup>. Here, we uncover a role for OPCs in shaping  
216 synaptic connectivity by engulfing synaptic inputs in sensory cortex in the late postnatal  
217 and mature mammalian brain. Our findings are consistent with the observation of axonal  
218 structures within OPCs as assessed by electron microscopy, and the regulation of axonal  
219 remodeling by OPCs in the zebrafish tectum<sup>22,23</sup>.

220

221 Here, we place these observations within an important neurobiological context by  
222 showing that OPCs engulf more synaptic material when visual experience is heightened,  
223 and that this sensory-dependent increase in OPC-mediated engulfment requires  
224 microglia. The ability of OPCs to detect changes in sensory experience is consistent with  
225 previous reports demonstrating that sensory input, and neuronal activity more generally,  
226 regulate OPC maturation and proliferation, as well as oligodendrogenesis<sup>24-27</sup>.  
227 Additionally, microglia are known to contribute to OPC survival, development, and  
228 maintenance in adulthood<sup>28,29</sup>. In combination with these studies, our data suggest that  
229 experience can impact OPCs in multiple ways, not only by driving adaptive myelination  
230 but also by triggering OPCs to directly remodel synaptic connectivity through the

231 engulfment of presynaptic terminals. Given mounting evidence that deficits in the  
232 functions of oligodendrocyte lineage cells exacerbate neurological disorders associated  
233 with synapse loss including Alzheimer's disease and multiple sclerosis<sup>30,31</sup>, our discovery  
234 that OPCs can refine synapses through the engulfment of presynaptic inputs is likely to  
235 shed light on mechanisms of disease in the human brain.

236

### 237 **Acknowledgements:**

238

239 We thank Drs. Ullas Pedmale and Daniele Rosado for the use of their Airyscan  
240 microscope, funded by NIH grants R35GM125003, GM12500303S1, and  
241 GM12500304S1. In addition, we thank Drs. Beth Stevens, Cody Walters, and Ullas  
242 Pedmale for critical feedback on the manuscript. Erika Wee, director of the microscopy  
243 core at Cold Spring Harbor Laboratory, assisted with confocal and SIM microscopy  
244 imaging. This work was funded by a Rita Allen Scholar Award, a McKnight Scholar Award,  
245 and a Klingenstein-Simons Fellowship to L.C.

246

### 247 **Author contributions:**

248

249 L.C. conceptualized the study. Y.A. generated the initial discovery that OPCs engulf  
250 synaptic inputs, and was instrumental in overseeing experiments performed by other  
251 authors. A.F. performed and analyzed two-photon microscopy experiments. J.D., U.V.,  
252 J.K., and A-S. N. generated and analyzed experimental data. L.C. wrote the first draft of  
253 the manuscript after which all authors contributed to its editing.

254

### 255 **Methods:**

256

#### 257 **Animal Models**

258

259 All experiments were performed in compliance with protocols approved by the Institutional  
260 Animal Care and Use Committee (IACUC) at Cold Spring Harbor Laboratory according  
261 to protocol #20-3. The following mouse lines were obtained from the Jackson Laboratory:  
262 C57Bl/6J (JAX: 000664), NG2-CreER<sup>T2</sup> (Cspg4-Cre, JAX: 008538), and Rosa26-CAG-  
263 LsL-TdTomato (JAX: 007914; Ai14). NG2-CreER<sup>T2</sup> mice were bred with Ai14 mice in-  
264 house to yield NG2-CreER<sup>T2</sup>; TdTomato mice in which oligodendrocyte precursor cells  
265 (OPCs) are labeled with TdTomato upon tamoxifen (TAM) administration. Except when  
266 noted, animals were housed in normal 12:12 hour light-dark cycles. Analyses were  
267 performed on equal numbers of male and female mice at postnatal days (P)10, P20, P27,  
268 and P90. Live imaging was performed on animals between 2 and 6 months of age. No  
269 sex differences were observed in this study.

270

#### 271 **Sensory Deprivation and Stimulation Paradigm**

272

273 To study the effects of sensory experience on synapse engulfment by OPCs and  
274 microglia, C57Bl/6J mice were reared according to a standard 12-hour light/dark cycle  
275 until P20, at which point they were weaned from their mothers and separated into  
276 experimental groups. One cohort continued to be housed in normal light conditions until

277 P27. Two cohorts of mice were placed in a well-ventilated light-proof cabinet (Actimetrics)  
278 until P27 (late-dark-reared, LDR). One of the two cohorts subjected to LDR was harvested  
279 at P27 in the dark by an investigator using night vision goggles while the other was acutely  
280 re-exposed to light for ten hours, then harvested. These cohorts are referred to as LDR  
281 and LDR+10 throughout the paper.

282

### 283 **Plexxicon 5622 Administration**

284

285 To study the role of microglia on OPC function, mice were fed irradiated 1200 mg/kg  
286 freebase Plexxicon 5622-formulated chow (PLX; Research Diets, Inc.: D1110404i), which  
287 blocks Colony Stimulating Factor Receptor 1, or control chow produced in parallel  
288 (D19101002) from P18 to P27 to pharmacologically deplete microglia from the brain. Mice  
289 were fed on the chow ad libitum and the investigator provided all husbandry for the mice  
290 during treatment.

291

### 292 **Tamoxifen Administration**

293

294 Tamoxifen (Sigma: T5648) was dissolved in sunflower oil (Sigma: S5007) overnight at 37  
295 °C with shaking to achieve a working concentration of 20 mg/mL. Animals were  
296 administered a bolus of TAM at 150 mg/kg on two consecutive days at a minimum of two  
297 weeks before imaging and analysis.

298

### 299 **Immunofluorescence**

300

301 Animals were anesthetized with isoflurane and perfused with ice cold Phosphate Buffered  
302 Saline (PBS) followed by 4 % paraformaldehyde (PFA). Brains were removed and  
303 incubated in 4% PFA overnight at 4° C. The next day, the brains were washed by rotating  
304 in fresh PBS 3 times for 10 mins and then allowed to sink in 15% and then 30% sucrose  
305 in PBS at 4° C. In preparation for sectioning, brains were embedded in OCT (VWR:  
306 25608-930) and stored at -80° C. 25 µm thick coronal or sagittal sections containing the  
307 primary visual cortex and dLGN were collected onto Superfrost Plus microscope slides  
308 (Thermo Fisher Scientific: 1255015) using a cryostat and stored at -80° C.

309 For staining, the sections were washed at room temperature (RT) for 10 mins in PBS,  
310 and then dried for 10 mins at 60° C. A hydrophobic barrier was drawn around the samples  
311 using an ImmEdge Pen (VWR: 101098-065). A blocking solution (5 % Fetal Bovine Serum  
312 [FBS] or Normal Goat Serum [NGS] and 0.3% Triton-X100, in PBS) was applied for 1  
313 hour at RT. Next, the blocking solution was replaced with primary antibodies prepared in  
314 a probing solution (5% FBS or NGS and 0.1% Triton in PBS). Primary antibodies were  
315 incubated at 4° C overnight (O/N) in most cases, and for 48 hours for staining with rat α  
316 NG2 (1:250; Thermo Fisher Scientific: MA5-24247). Other primary antibodies used  
317 include guinea pig α Vglut2 at 1:1000 (Sigma: AB2251-I); rabbit α Iba1 at 1:1000 (Wako:  
318 019-19741); rat α Lamp2 at 1:200 (Abcam: AB13524); and rabbit α Sox10 at 1:100  
319 (Abcam: AB227680). After primary incubation, the tissue was washed 4 times with  
320 washing solution (PBS adjusted to 0.1% Triton) for 10 mins per wash. The following  
321 Alexafluor secondary antibodies (Invitrogen) were diluted to 1:1000 in probing solution  
322 and incubated on the tissue for 1 hour at RT: goat α guinea pig 647 (A21450); goat α

323 guinea pig 555 (A21435); donkey  $\alpha$  rabbit 405 (A21450); goat  $\alpha$  rabbit 488 (A11008); goat  
324  $\alpha$  rabbit 647 (A21428); goat  $\alpha$  rat 405 (A48261); donkey  $\alpha$  rat 488 (A21208); and goat  $\alpha$   
325 rat 647 (A21247). Following secondary incubation, the sections were washed 4 times with  
326 washing solution, mounted with Fluoromount-G (SouthernBiotech: 0100-01), and  
327 coverslipped.

328

### 329 **Confocal Imaging Parameters**

330

331 In most cases, confocal images were acquired on an LSM710 or LSM780 (Zeiss)  
332 microscope with 20x (air) and 63x (oil) objectives. For engulfment analyses, the  
333 microscope was centered over layer 4 of visual cortex (V1) at 20x, identified by a Vglut2+  
334 band, before transitioning to 63x. Z-stack images were acquired to capture several OPCs  
335 and/or microglia. To highlight the expression of phagocytic genes in OPCs, *Pdgfra*+ nuclei  
336 were imaged at 63x.

337

### 338 **NG2-Cre<sup>T2</sup>;TdTomato Validation**

339

340 Fixed brain sections from NG2-Cre<sup>T2</sup>;TdTomato mice were stained for Sox10 and NG2  
341 as described above, and imaged on a confocal at 20x. To determine the percentage of  
342 TdTomato+ cells that were either within the oligodendrocyte lineage (Sox10+) or putative  
343 OPCs (NG2+), maximum projections of the images were generated to be manually  
344 counted with the “Cell Counter” plugin in ImageJ. First, markers were placed at all  
345 TdTomato+ cells. Next, at each TdTomato+ marker location, the investigator determined  
346 and tabulated whether the location was also Sox10+ or NG2+.

347

### 348 **Fluorescence *In Situ* Hybridization (FISH)**

349

350 Brains were fixed by perfusion in 4% PFA, embedded in OCT and stored at -80° C until  
351 processing. Sections of 25  $\mu$ m thickness were mounted on Superfrost Plus slides.  
352 Multiplexed single-molecule FISH was performed using the RNAscope platform V2 kit  
353 (Advanced Cell Diagnostics [ACD]: 323100) according to the manufacturer’s protocol for  
354 fixed-frozen sections. The samples were mounted with Fluoromount-G with DAPI  
355 (SouthernBiotech: 0100-20), and coverslipped. Commercial probes obtained from ACD  
356 detected the following genes: *Pdgfra* (480661-C2), *Mertk* (441241-C3), *Calcr1* (452281-  
357 C3), *Arsb* (837631), and *Ptprj* (883051).

358

### 359 **Re-analysis of Single-cell RNA-sequencing Data**

360

361 Data from Hrvatin et al, *Nature Neuroscience*, 2018 were downloaded as a raw counts  
362 matrix from the Gene Expression Omnibus database (GSE 102827). While this dataset  
363 includes cells from mice that were dark-reared, dark-reared then re-exposed to light for 1  
364 hour, and dark-reared then re-exposed to light for 4 hours, none of the genes we plotted  
365 were differentially expressed between conditions so we plotted their expression across  
366 all cells in the dataset. The data were processed via the Seurat v3 pipeline using standard  
367 parameters. OPC clusters were identified by enriched expression of *Pdgfra*. For Figure  
368 S2, transcripts were plotted across the UMAP using the FeaturePlot function in Seurat.



369

## 370 **Engulfment Quantification**

371

372 Preprocessing of 63x images stained for OPCs and/or microglia was performed in  
373 ImageJ. First, the “Enhance Contrast” command was run so that 0.1% of pixels would be  
374 saturated, and then a mean filter with pixel radius of 1.5  $\mu\text{m}$  was applied. Next, a region  
375 of interest (ROI) was drawn around a given cell, cropped into its own file and used in  
376 downstream Imaris (BitPlane) processing and analysis. In Imaris, volumetric  
377 reconstructions of the fluorescence images were created using both the “Spots” and/or  
378 the “Surfaces” Objects. A Surface Object was used to reconstruct a cell of interest  
379 following the guided creation wizard. The investigator then deleted any discontinuous part  
380 of the Surface that could not be clearly traced back to the soma of the cell, using the  
381 fluorescence as reference. Next, this cell Surface was used as the ROI to create a mask  
382 of target channels (e.g. Vglut2, Lamp2), defined by the signal included within the Surface.  
383 New Surface Objects were generated using these masks, which represent the internal  
384 contents of the cell. Across conditions within a biological replicate the same creation  
385 parameters were used in generating the internalized Surfaces. The volumes of the cell  
386 and internalized Surfaces were collected from the statistics tab in Imaris. The internalized  
387 volume was then normalized to a cell’s volume to represent the amount of engulfment by  
388 a given cell.

389 In some cases, masks of the Lamp2 channel within an OPC Surface was made to  
390 reconstruct lysosomes. To quantify lysosome contents, the same internalization approach  
391 was used where the lysosomal Surface was treated as the “cell” to mask the target  
392 channel.

393 To quantify the distance of engulfment loci from the center of an OPC, we first defined  
394 the center of the cell by manually placing a Spots Object at the soma of the reconstructed  
395 cell using the auto-depth-based-on-fluorescence option. Next, a Spots Object of the  
396 masked Vglut2 signal was created using the wizard, with a Spots-diameter of 2  $\mu\text{m}$ . This  
397 approach did not place spots at every Vglut2 puncta, but instead placed a Spot near  
398 collections of Vglut2 puncta. The predefined “Shortest Distance to Spots” statistic was  
399 used to measure the distances between the engulfment loci and the center of the cell. To  
400 quantify the range of synaptic surveillance by a given OPC, the axis-aligned bounding-  
401 box statistic of the engulfment loci Spots was collected.

402

## 403 **Structured Illumination Microscopy (SIM)**

404

405 Brains were fixed in 4% PFA then embedded in OCT and stored at  $-80^{\circ}\text{C}$ . Sections of 25  
406  $\mu\text{m}$  thickness were subjected to immunofluorescence in a free-floating format. Each  
407 section was placed in one well of a 24-well plate. Sections were stained with primary and  
408 secondary antibody as described under “Immunofluorescence” above, except in larger  
409 volumes of 1 mL. Stained sections were mounted onto thickness no. 1  $\frac{1}{2}$  High-  
410 performance Zeiss cover glasses (Thermo Fisher Scientific: 10474379) and then  
411 centered onto Superfrost Plus microscope slides with ProLong™ Gold Antifade Mountant  
412 (Thermo Fisher Scientific: P36934). Stained samples were kept at  $4^{\circ}\text{C}$  until imaging. 3-  
413 D structured illumination microscopy (3-D SIM) of fixed, stained samples were acquired  
414 using an Applied Precision V3 OMX system equipped with a 100x/1.4 NA U-PLANAPO



415 objective (Olympus) and two Cascade II® 512 EM-CCD cameras (Photometrics). Stacks  
416 of 6 optical sections (125 nm step) were acquired consecutively in two channels (488 nm  
417 and 593 nm) using DeltaVision software (Applied Precision). 3-D super-resolution image  
418 stacks were reconstructed using SoftWorx 6.5.2 using channel specific OTFs and Wiener  
419 filter settings of 0.001 or 0.002. These image stacks were then imported into Imaris for  
420 volumetric reconstructions.

421

## 422 **Airyscan Imaging**

423

424 Samples were imaged on a Zeiss LSM900 microscope using the Airyscan mode with a  
425 63x objective. The image underwent Airyscan Processing with Auto Filter selected within  
426 Zeiss Zen. The processed image was then transferred to Imaris for volumetric  
427 reconstruction as described above.

## 428 **pAAV:hSYN-Synaptophysin-mCherry-eGFP (pSynDig)**

429 We purchased the reporter of presynaptic ATP Syn-ATP (Addgene: 51819) and the  
430 fluorescent marker hSYN-eGFP (Addgene: 50465) plasmids for downstream creation of  
431 the probe for Synaptic Digestion (pSynDig) construct. We amplified an elongated coding  
432 region for mCherry from Syn-ATP (forward primer  
433 ggcgagtcgagaaggtaccgGCAGCAATGGACGTGGTG; reverse primer:  
434 ccttgctcaccatggtggcgGGTCCCTTGACAGCTCG). The elongated coding region (1728  
435 bp) was then gel purified using the Qiagen MinElute Gel Extraction Kit (28604) and  
436 subjected to Gibson assembly via the New England Biosciences HiFi DNA Assembly  
437 Cloning Kit (NEB: E5520S) to insert the amplified region into the hSyn-eGFP vector  
438 following its linearization with BamHI (NEB: R0136S). The resulting plasmid was gel-  
439 purified and sequenced before packaging into an adeno-associated virus (AAV) to yield  
440 AAV5-hSYN-pSynDig at a titre of  $1.2 \times 10^{14}$  gc/mL.

## 441 **pSynDig Validation and Quantification**

442

443 We confirmed that pSynDig injections into the dLGN labeled Vglut2+ thalamocortical  
444 inputs in layer 4 of visual cortex (V1) by imaging mCherry, eGFP, and Vglut2+ puncta  
445 (following immunostaining with an antibody against Vglut2) in confocal images taken with  
446 a 63x objective at Nyquist settings for downstream deconvolution using Huygens  
447 Essentials (SVI). Images were deconvolved based upon imaging parameters (e.g. pixel  
448 resolution, excitation wavelength, number of excitation photons, depth of acquisition,  
449 numerical aperture of objective and medium, and emission wavelength) and the Huygens  
450 express deconvolution wizard set to conservative deconvolution as means of increasing  
451 image resolution and signal to noise. We measured the intensity of each channel using  
452 line intensity quantification in ImageJ. We observed largely overlapping mCherry and  
453 eGFP signal colocalized with Vglut2, as expected. To further validate this, we used the  
454 Imaris Coloc function to measure the degree of colocalization of both the eGFP and  
455 mCherry signals using the mean Pearson's correlation coefficients between 3 images per  
456 animal. As expected, we observed a small percentage of puncta that were mCherry+ but  
457 eGFP-. To verify that these mCherry+, eGFP- puncta represented inputs in the process  
458 of lysosomal degradation, we immunostained the tissue for the lysosomal marker Lamp2

459 and took 3-dimensional images (z-stacks) on a confocal microscope using a 63x  
460 objective. In post-processing, we applied a gaussian blur of 0.132  $\mu\text{m}$ . Maximum  
461 projections of the z-stacks were made, then the mean intensities of the mCherry, eGFP,  
462 and Lamp2 channels were quantified. Images were moved into Imaris, where lysosomes  
463 were reconstructed using a Surface Object. In the wizard, the recorded mean intensities  
464 from ImageJ were used as the threshold value to define the Surfaces. Masks of the eGFP  
465 and mCherry channels were made from the lysosome Surfaces to analyze the within-  
466 lysosome pSynDig signal. Surfaces of the masked eGFP and mCherry signals were  
467 created, this time using a  $0.75 \times (\text{recorded-mean-intensity})$  as the threshold. To quantify  
468 the intensity of mCherry and eGFP outside of lysosomes, the masked channels were  
469 subtracted from the original channels, thereby removing any signal that was within a  
470 lysosome. mCherry and eGFP Surfaces were generated from these subtracted channels,  
471 using the same wizard thresholds as for the within-lysosome group. The sum intensity  
472 statistic of the eGFP and mCherry signals were collected for the within- and outside-  
473 lysosome Surfaces, before being normalized to their respective mCherry signal. The  
474 example image in figure 2C was taken with a 63x objective with 1.5 x digital zoom, before  
475 being deconvolved for clarity.

476 To quantify pSynDig in OPCs, the same approach was used as for the within-lysosome  
477 group, where OPC Surfaces were reconstructed and used to mask the mCherry and  
478 eGFP channels. In figures 2E and F, only mCherry Surfaces are shown and were pseudo-  
479 colored white or magenta if they overlapped with an eGFP Surface or not, respectively.

480

#### 481 **OPC:Microglia Contact Quantification**

482

483 The same ImageJ pre-processing as above was applied to images, centered on an OPC  
484 then cropped to include the OPC and surrounding microglia. Surfaces for both cell types  
485 were created. OPC Surfaces were manually filtered to remove objects that did not  
486 originate from the soma. For the microglial signal, however, surfaces were kept even if  
487 the soma was not visible to avoid omitting important interactions between the processes  
488 of the two cell types. From the OPC Surface, the “Surface-Surface Contact Area” Imaris  
489 XTension ([https://github.com/Ironhorse1618/Python3.7-Imaris-XTensions/blob/master/XT\\_MJG\\_Surface\\_Surface\\_ContactArea2.py](https://github.com/Ironhorse1618/Python3.7-Imaris-XTensions/blob/master/XT_MJG_Surface_Surface_ContactArea2.py)) was run. Briefly, it  
490 creates a 1-voxel-thick shell of the OPC and the microglia, then masks where the two  
491 intersect. From this mask, a 1 voxel-thick Surface is created of the contact area. For  
492 consistency, we quantified the interaction with the volume statistic of the Surface instead  
493 of the surface area to avoid double counting each side of the Surface and adding the  
494 superfluous area created by the end-caps of the Surface. The volume was then  
495 normalized to the volume of the OPC to account for variations in OPC size. The skeletal  
496 representations of the OPCs were constructed using the Filaments Object for figure  
497 purposes only (Fig. 3B).

498

#### 499 **AAV injections**

500

501 Mice aged between 2-6 months were injected with a slow-release analgesic, meloxicam  
502 [2.5 mg/kg, subcutaneous] before being anesthetized using isoflurane (SomnoSuite, Kent  
503 Scientific; 3-5% induction, 1-2% maintenance). Once anesthetic depth was achieved,  
504 mice were placed onto a stereotaxic apparatus where body temperature was maintained

504 using a heating pad. Mice were then unilaterally injected with either AAV9-hSYN-eGFP  
505 (Addgene viral prep # 50465-AAV9) or AAV5-hSYN-pSynDig; 500  $\mu$ L with a flow rate of  
506 50 nL/min) into right hemisphere dLGN (2.15x, -2.15y, -2.9z mm from bregma). Following  
507 surgery, animals were administered Flunixin (10 mg/kg) and allowed to recover on a  
508 heating pad before returning them to their home cages.

## 509 **Chronic Window Implantation**

510 Mice (n = 10) aged between 2-6 months, previously injected with meloxicam [2.5 mg/kg,  
511 s.q.] were anesthetized using isoflurane (3-5% induction, 1-2% maintenance) and body  
512 temperature was maintained with a heating pad throughout surgery and during initial  
513 recovery. After initial AAV injection (as described above), a >3 mm diameter craniotomy  
514 was drilled using a dental drill (RWD: 78001) over primary visual cortex approximately  
515 +2.5 mm lateral, and -2.9 mm posterior from Bregma. A 3 mm glass coverslip, sterilized  
516 with 70% ethanol, was then placed over the craniotomy and a mixture of surgical glue  
517 (Vetbond: 3M) and cyanoacrylate glue was used to secure the coverslip onto the skull.  
518 The skull was covered with a thin layer of Vetbond and then sealed with dental cement  
519 (Ortho-Jet: Land Dental). Finally, a custom-made head bar was secured onto the skull  
520 using luting cement (Metabond: C&B). Mice were then administered flunixin meglumine  
521 [10mg/kg, i.p.], and allowed to recover on a heating pad until ambulatory and then were  
522 allowed to recover for 1-2 weeks before imaging. After recovery, the quality of the  
523 windows was checked before imaging, and mice with suboptimal windows were  
524 euthanized and used for downstream immunofluorescence quantification in fixed tissue.

## 525 ***In Vivo* 2-photon Imaging**

526 After recovery from window implantation (1-2 weeks), mice were secured into a custom  
527 head mount and movement restraint system. Mice were imaged using a custom 2-photon  
528 system (Independent Neuroscience Services) with a ThorLabs tunable Tiberius laser.  
529 Laser wavelength was tuned to 980 nm to image both TdTomato and eGFP concurrently.  
530 We utilized a 16x (N.A. 0.8) water immersion lens (Nikon), and light was captured using  
531 two photomultiplier tubes fitted with filters (520-565, and >565 nm) for eGFP and  
532 TdTomato respectively. While imaging between (150 and 350  $\mu$ m depth from the pia) the  
533 laser power was kept below 30 mW to avoid photo-damage. Imaging volumes were  
534 captured at near Nyquist settings (either 512x512, and 1024x1024 for time-lapse and  
535 single time point recordings respectively; resulting in voxels  $\leq$  264 x 264 x 1000 nm) were  
536 selected for fields with TdTomato+ cells with distinguishable OPC morphology and  
537 thalamocortical inputs. For time-lapse recording, volumes were taken once per minute.  
538 Raw image files were then processed using Huygen's software (SVI, Netherlands) for  
539 crosstalk correction, registration along the z and t dimensions, and then processed with  
540 their multiphoton deconvolution wizard (set to conservative deconvolution as previously  
541 done for pSynDig experiments). Crosstalk-corrected, registered and deconvolved images  
542 were then imported into Imaris and Surface Objects of OPCs and thalamocortical inputs  
543 were created, with surfaces of OPCs being limited to the OPC soma and major process.  
544 Thalamocortical inputs were then classified by their distance to the OPC's surface using  
545 the "Shortest Distance to Surfaces" filter function in Imaris, with thalamocortical inputs  
546 that were greater than 0 nm classified as non-contacting inputs, inputs with a distance to

547 OPCs 0 nm classified as contacting inputs, and inputs with a distance of less than -270  
548 nm classified as “engulfed” inputs. The classified thalamocortical inputs’ volume were  
549 then averaged per video and per time frame, and then normalized to the average volume  
550 of non-contacting inputs over the entire imaging period, where applicable. For data  
551 presentation, the OPC surface volume was pseudocolored with green and classified input  
552 volumes were pseudocolored using the, “Overlapped Volume Ratio to Surface” function.

### 553 *Note on identifying OPCs in vivo*

554 Because we typically imaged NG2-CreER<sup>T2</sup>; TdTomato mice following greater than 2  
555 weeks post-TAM, some of the Cre-expressing OPCs had differentiated to label mature  
556 oligodendrocytes with TdTomato by the time of imaging. However, OPCs could be easily  
557 distinguished from oligodendrocytes based upon their oblong, bean-shaped somata  
558 compared to oligodendrocytes, the somata of which were more spherical (see Extended  
559 Data Figure 1).

### 560 **Blinding**

561  
562 Experimenters were blinded to conditions for quantitative imaging experiments. One  
563 experimenter harvested the tissue and assigned it a randomized label before providing  
564 the blinded tissue to another experimenter for analysis. After data acquisition and  
565 processing, the data were plotted in Graphpad by L.C., A.F., or Y.A. after which the  
566 samples were unblinded.

567

### 568 **Statistics**

569

570 All statistics were performed in Graphpad by L.C., A.F., or Y.A. and are described in the  
571 figure legends.

572

### 573 **References:**

574

- 575 1 Hooks, B. M. & Chen, C. Circuitry Underlying Experience-Dependent Plasticity in  
576 the Mouse Visual System. *Neuron* **106**, 21-36, doi:10.1016/j.neuron.2020.01.031  
577 (2020).
- 578 2 Schafer, D. P. *et al.* Microglia sculpt postnatal neural circuits in an activity and  
579 complement-dependent manner. *Neuron* **74**, 691-705,  
580 doi:10.1016/j.neuron.2012.03.026 (2012).
- 581 3 Chung, W. S. *et al.* Astrocytes mediate synapse elimination through MEGF10  
582 and MERTK pathways. *Nature* **504**, 394-400, doi:10.1038/nature12776 (2013).
- 583 4 Herbert, A. L. & Monk, K. R. Advances in myelinating glial cell development. *Curr*  
584 *Opin Neurobiol* **42**, 53-60, doi:10.1016/j.conb.2016.11.003 (2017).
- 585 5 Bergles, D. E. & Richardson, W. D. Oligodendrocyte Development and Plasticity.  
586 *Cold Spring Harb Perspect Biol* **8**, a020453, doi:10.1101/cshperspect.a020453  
587 (2015).
- 588 6 Akay, L. A., Effenberger, A. H. & Tsai, L. H. Cell of all trades: oligodendrocyte  
589 precursor cells in synaptic, vascular, and immune function. *Genes Dev* **35**, 180-  
590 198, doi:10.1101/gad.344218.120 (2021).



- 591 7 Mount, C. W. & Monje, M. Wrapped to Adapt: Experience-Dependent  
592 Myelination. *Neuron* **95**, 743-756, doi:10.1016/j.neuron.2017.07.009 (2017).
- 593 8 Traiffort, E., Kassoussi, A., Zahaf, A. & Laouarem, Y. Astrocytes and Microglia as  
594 Major Players of Myelin Production in Normal and Pathological Conditions. *Front*  
595 *Cell Neurosci* **14**, 79, doi:10.3389/fncel.2020.00079 (2020).
- 596 9 Bergles, D. E., Roberts, J. D., Somogyi, P. & Jahr, C. E. Glutamatergic synapses  
597 on oligodendrocyte precursor cells in the hippocampus. *Nature* **405**, 187-191,  
598 doi:10.1038/35012083 (2000).
- 599 10 Mount, C. W., Yalcin, B., Cunliffe-Koehler, K., Sundaresh, S. & Monje, M.  
600 Monosynaptic tracing maps brain-wide afferent oligodendrocyte precursor cell  
601 connectivity. *Elife* **8**, doi:10.7554/eLife.49291 (2019).
- 602 11 Mataga, N., Mizuguchi, Y. & Hensch, T. K. Experience-dependent pruning of  
603 dendritic spines in visual cortex by tissue plasminogen activator. *Neuron* **44**,  
604 1031-1041, doi:10.1016/j.neuron.2004.11.028 (2004).
- 605 12 Sato, M. & Stryker, M. P. Distinctive features of adult ocular dominance plasticity.  
606 *J Neurosci* **28**, 10278-10286, doi:10.1523/JNEUROSCI.2451-08.2008 (2008).
- 607 13 Schafer, D. P., Lehrman, E. K., Heller, C. T. & Stevens, B. An engulfment assay:  
608 a protocol to assess interactions between CNS phagocytes and neurons. *J Vis*  
609 *Exp*, doi:10.3791/51482 (2014).
- 610 14 Huang, W. *et al.* Novel NG2-CreERT2 knock-in mice demonstrate  
611 heterogeneous differentiation potential of NG2 glia during development. *Glia* **62**,  
612 896-913, doi:10.1002/glia.22648 (2014).
- 613 15 Hrvatin, S. *et al.* Single-cell analysis of experience-dependent transcriptomic  
614 states in the mouse visual cortex. *Nat Neurosci* **21**, 120-129,  
615 doi:10.1038/s41593-017-0029-5 (2018).
- 616 16 Mi, H., Muruganujan, A., Casagrande, J. T. & Thomas, P. D. Large-scale gene  
617 function analysis with the PANTHER classification system. *Nat Protoc* **8**, 1551-  
618 1566, doi:10.1038/nprot.2013.092 (2013).
- 619 17 Lee, J. H. *et al.* Astrocytes phagocytose adult hippocampal synapses for circuit  
620 homeostasis. *Nature* **590**, 612-617, doi:10.1038/s41586-020-03060-3 (2021).
- 621 18 Cheadle, L. *et al.* Visual Experience-Dependent Expression of Fn14 Is Required  
622 for Retinogeniculate Refinement. *Neuron* **99**, 525-539 e510,  
623 doi:10.1016/j.neuron.2018.06.036 (2018).
- 624 19 Cheadle, L. *et al.* Sensory Experience Engages Microglia to Shape Neural  
625 Connectivity through a Non-Phagocytic Mechanism. *Neuron* **108**, 451-468 e459,  
626 doi:10.1016/j.neuron.2020.08.002 (2020).
- 627 20 Gunner, G. *et al.* Sensory lesioning induces microglial synapse elimination via  
628 ADAM10 and fractalkine signaling. *Nat Neurosci* **22**, 1075-1088,  
629 doi:10.1038/s41593-019-0419-y (2019).
- 630 21 Nguyen, P. T. *et al.* Microglial Remodeling of the Extracellular Matrix Promotes  
631 Synapse Plasticity. *Cell* **182**, 388-403 e315, doi:10.1016/j.cell.2020.05.050  
632 (2020).
- 633 22 Buchanan, J. E., L., Collman, F., Jorstad, N.L., Bakken, T.E., Ott, C., Glatzer, J.,  
634 Bleckert, A.A., Bodor, A.L., Brittan, D., Bumbarger, D.J., Mahalingam, G.,  
635 Seshamani, S., Schneider-Mizell, C., Takeno, M.M., Torres, R., Yin, W., Hodge,  
636 R.D., Castro, M., Dorkenwald, S., Ih, D., Jordan, C.S., Kemnitz, N., Lee, K., Lu,



- 637 R., Macrina, T., Mu, S., Popovych, S., Silversmith, W.M., Tartavull, I., Turner,  
638 N.L., Wilson, A.M., Wong, W., Wu, J., Zlateski, A., Zung, J., Lippincott-Schwartz,  
639 J., Lein, E.S., Seung, H.S., Bergles, D.E., Reid, R.C., Marcarico da Costa, N. .  
640 Oligodendrocyte precursor cells prune axons in the mouse neocortex. *BioRxiv*,  
641 doi:<https://www.biorxiv.org/content/10.1101/2021.05.29.446047v1.full> (2021).  
642 23 Xiao, Y., Hoodless, L.J., Petrucco, L., Portugues, R., Czopka, T. Oligodendrocyte  
643 precursor cells sculpt the visual system by regulating axonal remodeling. *BiorXiv*,  
644 doi:<https://www.biorxiv.org/content/10.1101/2021.03.11.434829v1> (2021).  
645 24 Etxeberria, A. *et al.* Dynamic Modulation of Myelination in Response to Visual  
646 Stimuli Alters Optic Nerve Conduction Velocity. *J Neurosci* **36**, 6937-6948,  
647 doi:10.1523/JNEUROSCI.0908-16.2016 (2016).  
648 25 Hughes, E. G., Orthmann-Murphy, J. L., Langseth, A. J. & Bergles, D. E. Myelin  
649 remodeling through experience-dependent oligodendrogenesis in the adult  
650 somatosensory cortex. *Nat Neurosci* **21**, 696-706, doi:10.1038/s41593-018-0121-  
651 5 (2018).  
652 26 Gibson, E. M. *et al.* Neuronal activity promotes oligodendrogenesis and adaptive  
653 myelination in the mammalian brain. *Science* **344**, 1252304,  
654 doi:10.1126/science.1252304 (2014).  
655 27 Shin, H. & Kawai, H. D. Visual deprivation induces transient upregulation of  
656 oligodendrocyte progenitor cells in the subcortical white matter of mouse visual  
657 cortex. *IBRO Neurosci Rep* **11**, 29-41, doi:10.1016/j.ibneur.2021.06.004 (2021).  
658 28 Hagemeyer, N. *et al.* Microglia contribute to normal myelinogenesis and to  
659 oligodendrocyte progenitor maintenance during adulthood. *Acta Neuropathol*  
660 **134**, 441-458, doi:10.1007/s00401-017-1747-1 (2017).  
661 29 Nicholas, R. S., Wing, M. G. & Compston, A. Nonactivated microglia promote  
662 oligodendrocyte precursor survival and maturation through the transcription  
663 factor NF-kappa B. *Eur J Neurosci* **13**, 959-967, doi:10.1046/j.0953-  
664 816x.2001.01470.x (2001).  
665 30 Stadelmann, C., Timmler, S., Barrantes-Freer, A. & Simons, M. Myelin in the  
666 Central Nervous System: Structure, Function, and Pathology. *Physiol Rev* **99**,  
667 1381-1431, doi:10.1152/physrev.00031.2018 (2019).  
668 31 Nasraby, S. E., Rizvi, B., Goldman, J. E. & Brickman, A. M. White matter  
669 changes in Alzheimer's disease: a focus on myelin and oligodendrocytes. *Acta*  
670 *Neuropathol Commun* **6**, 22, doi:10.1186/s40478-018-0515-3 (2018).  
671

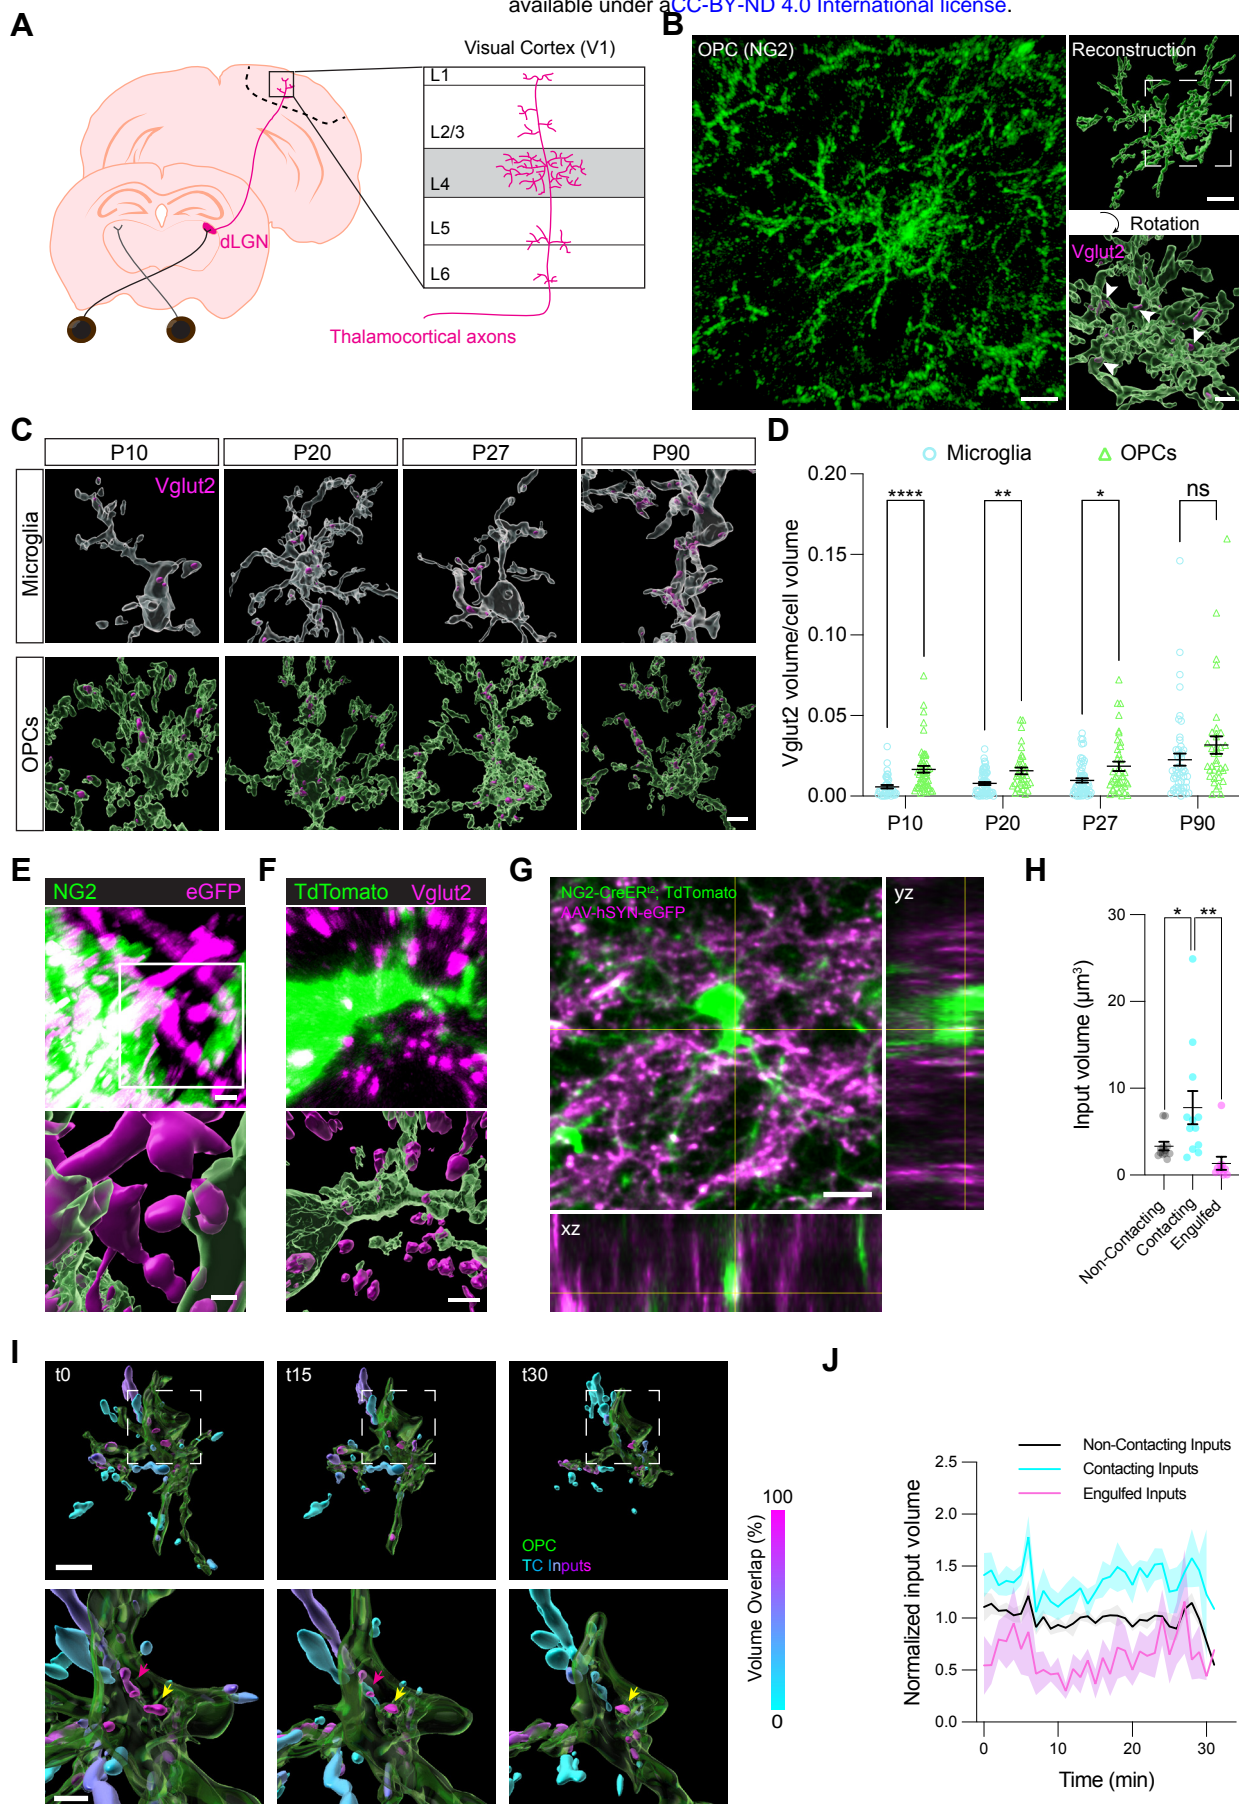

**Figure 1. OPCs engulf thalamocortical synaptic inputs in primary visual cortex.**

**Figure 1. OPCs engulf thalamocortical synaptic inputs in primary visual cortex.**

(A) Schematic of thalamocortical (TC) inputs from the dorsal lateral geniculate nucleus (dLGN) synapsing onto layer four of primary visual cortex (V1). (B) Confocal image of an oligodendrocyte precursor cell (OPC) immunostained for NG2 (green) alongside volumetric reconstructions of the OPC with and without engulfed synaptic inputs immunostained for Vglut2 (magenta; white arrows). Scale bar, 10  $\mu\text{m}$ . Inset scale bar, top: 5  $\mu\text{m}$ ; bottom: 2  $\mu\text{m}$ . (C) Volumetric reconstructions of microglia (Iba1, white) and OPCs (NG2, green) containing TC inputs (Vglut2, magenta) at multiple postnatal ages. Scale bar, 5  $\mu\text{m}$ . (D) Quantification of the volume of synaptic material contained within the microglial or OPC volume. Two-way ANOVA with Geisser-Greenhouse correction (Cell type:  $p < 0.0001$ ; age:  $p < 0.0001$ ; interaction between cell type and age:  $p > 0.05$ ) and Šídák multiple comparisons.  $n$  (microglia/OPC): P10 = 38/53, P20 = 63/35, P27 = 60/39, P90 = 49/36, from 3 mice per group. (E) Confocal image and reconstruction of an NG2-immunostained OPC (green) containing AAV-hSYN-eGFP+ TC inputs from the dLGN pseudocolored in magenta. Scale bar, 2  $\mu\text{m}$ . Inset scale bar, 2  $\mu\text{m}$ . (F) Confocal image and reconstruction of an OPC in a NG2-CreER<sup>T2</sup>; TdTomato+ reporter mouse (pseudocolored in green) containing Vglut2-immunostained synaptic inputs (magenta). Scale bar, 2.5  $\mu\text{m}$ . (G) Two-photon image of a TdTomato+ OPC (green) interacting with AAV-hSYN-eGFP+ TC axons and inputs (magenta) in V1 of an awake mouse. Orthogonal projections shown below and to the right. Scale bar, 10  $\mu\text{m}$ . (H) Quantification of the average volumes of synaptic inputs depending upon whether they contact OPCs, are engulfed by OPCs, or do not interact with OPCs. One-way ANOVA ( $p < 0.0001$ ) with Tukey post-hoc test.  $n = 12$  volumes from 3 mice. (I) Volumetric reconstructions of OPCs (green) interacting with synaptic inputs colored based upon percentage overlap with the OPC (color legend to right of images). Inputs that are completely internalized are shown in magenta while those that do not contact the OPC are in cyan. Representative images are taken from a thirty-minute time-lapse imaging session shown in supplemental movie 1. Scale bars, top: 10  $\mu\text{m}$ ; bottom: 5  $\mu\text{m}$ . Yellow arrows, engulfed input that is present throughout imaging session. Magenta arrows, engulfed input that disappears during session. (J) Average volume of all inputs across the imaging period depending upon whether the inputs are in contact with or engulfed by OPCs. Mixed effects analysis of synapse category,  $p < 0.001$ , time  $p < 0.05$ .  $n = 6$  videos taken from 3 mice. In (D) and (H), individual data points shown with bars representing mean  $\pm$  SEM. \* $p < 0.05$ , \*\* $p < 0.01$ , \*\*\*\* $p < 0.0001$ . In (J), solid lines represent mean and shaded areas represent SEM.



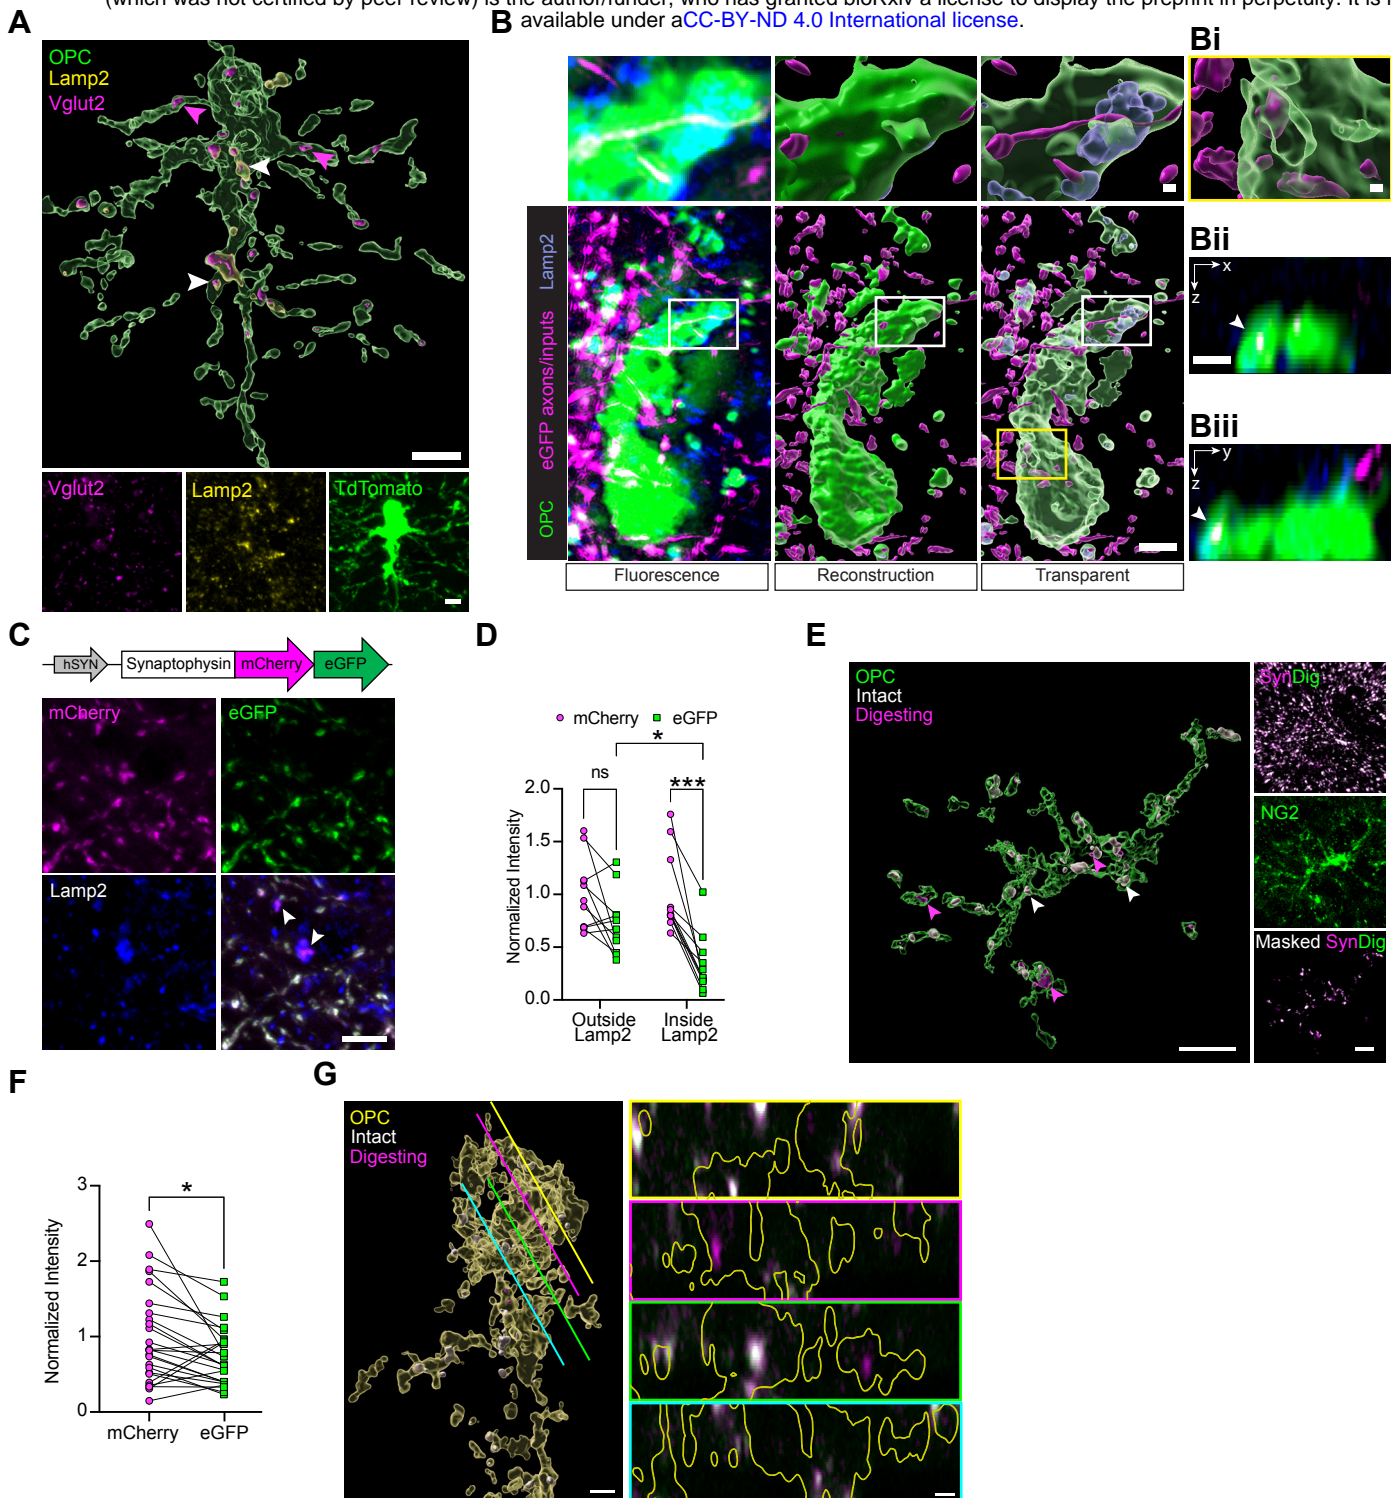

**Figure 2. Inputs engulfed by OPCs localize to lysosomes.**

**Figure 2. Inputs engulfed by OPCs localize to lysosomes.** (A) Confocal images of an OPC from an NG2-CreER<sup>T2</sup>; TdTomato mouse (pseudocolored in green) immunostained for TC inputs (Vglut2, magenta) and the lysosomal marker Lamp2 (yellow). Above, volumetric reconstruction of merged signals. White arrows, points of colocalization between Vglut2 and Lamp2. Magenta arrows, Vglut2 without Lamp2. Scale bar, 5  $\mu\text{m}$ . Inset scale bar, 5  $\mu\text{m}$ . (B) Structured Illumination Microscopy (SIM) images and their respective reconstructions of AAV-hSYN-eGFP+ thalamocortical inputs (magenta) and NG2-CreER<sup>T2</sup>; TdTomato+ OPC (green) with Lamp2+ lysosomes (blue). Scale bar, 16  $\mu\text{m}$ . Inset scale bar, 1  $\mu\text{m}$ . (Bi) Increased magnification of Vglut2+ inputs that are not associated with Lamp2. Scale bar, 1  $\mu\text{m}$ . (Bii) and (Biii) orthogonal views demonstrating presynaptic material completely internalized by the OPC. Scale bars, 1  $\mu\text{m}$ . (C) Schematic of the AAV-hSYN-pSynDig virus and confocal images demonstrating the quenching of eGFP fluorescence selectively within Lamp2+ lysosomes (white arrows). Scale bar, 5  $\mu\text{m}$ . (D) Quantification of the mCherry and eGFP signal at inputs outside of and within lysosomes normalized to the mCherry signal. The eGFP signal was significantly decreased compared to mCherry signal only at inputs within lysosomes. Connected points represent data from one image. Two-way ANOVA (Signal:  $p < 0.0001$ ; Localization:  $p > 0.05$ ; Interaction between signal and localization:  $p > 0.05$ ) with Tukey post-hoc test.  $n = 11$  images from 3 mice. (E) Confocal images of an NG2-stained OPC (green, right middle), pSynDig expressing inputs (magenta and white; right top), and an image of the pSynDig-expressing inputs within the volume of the OPC (right bottom). Scale bar, 10  $\mu\text{m}$ . Left, volumetric reconstruction of OPC and pSynDig-expressing inputs. Scale bar, 10  $\mu\text{m}$ . (F) Quantification of pSynDig input signal within OPCs. Ratio paired t-test mCherry versus eGFP:  $p < 0.05$ ;  $n = 25$  cells from 3 mice. (G) Reconstruction of an OPC (yellow) and pSynDig fluorescent signal (intact inputs, white; inputs being digested, magenta) in images taken on an Airyscan super-resolution microscope. Lines demonstrate the location along the reconstructed OPC from which the cross-section image on the right is taken. Lines are color-matched to the borders of the cross-sections. In panels on the right, the OPC volume is outlined in yellow. Scale bar, 2  $\mu\text{m}$ . Cross-section scale bar, 1  $\mu\text{m}$ . \* $p < 0.05$ , \*\*\* $p < 0.001$ .



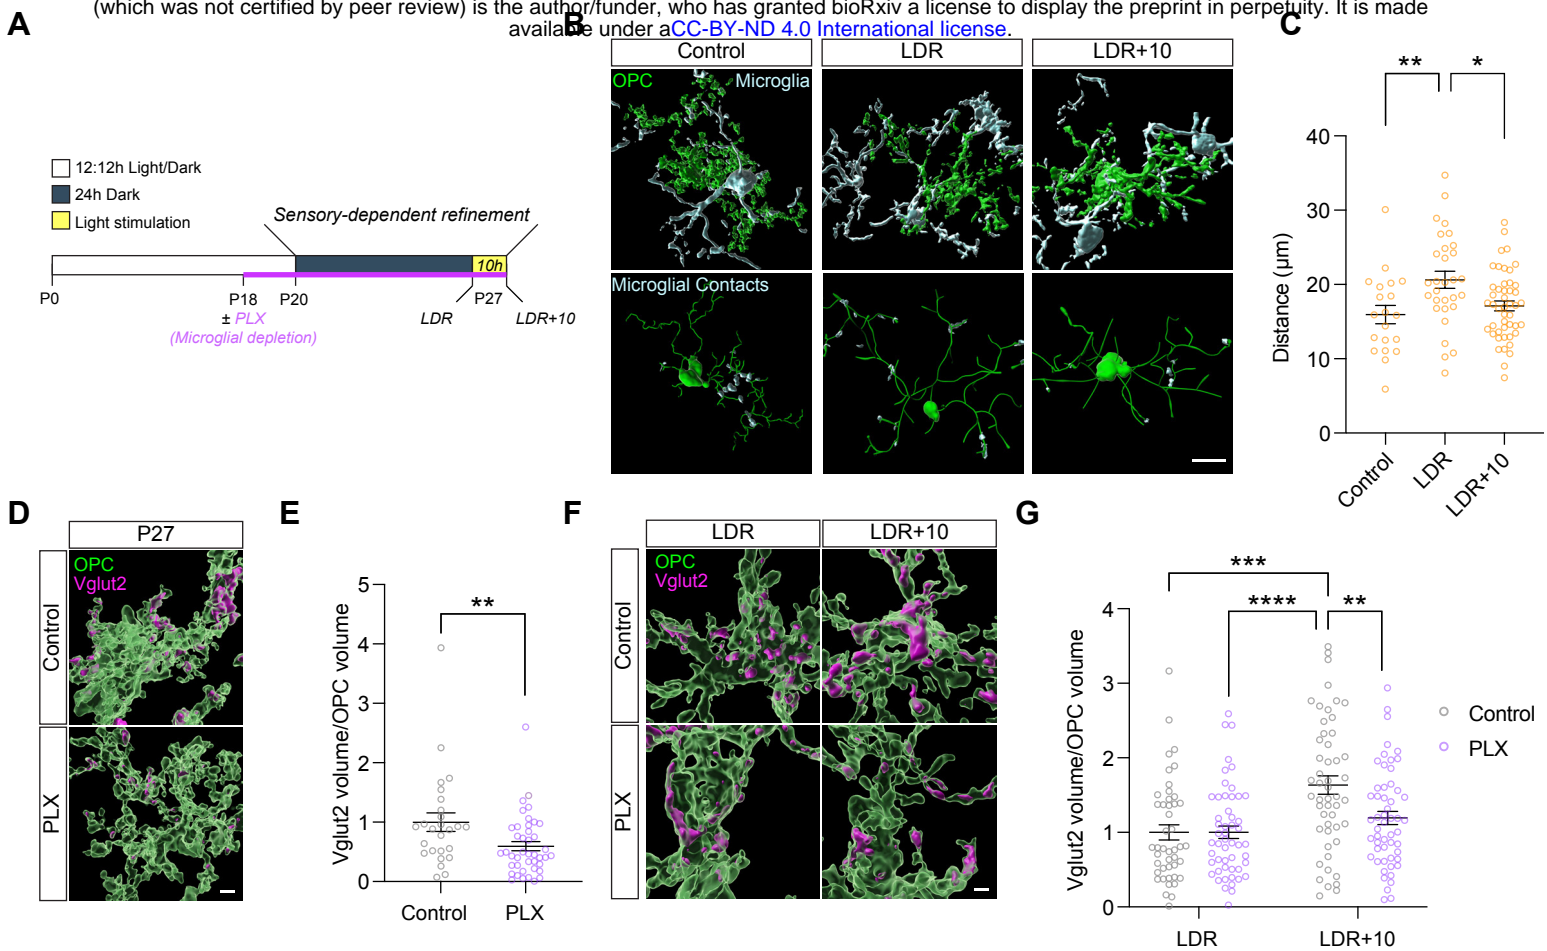

**Figure 3. The engulfment of synaptic inputs by OPCs is regulated by sensory experience and microglia.** (A) Schematic of the late dark rear (LDR) visual deprivation/stimulation and microglial depletion paradigm. (B) Top, volumetric reconstructions of OPCs stained for NG2 (green) and microglia stained for Iba1 (cyan) demonstrating physical contacts between the two cell types. Bottom, skeletonized OPC somas and processes (green) with microglial contact points shown in cyan. Control, mice reared according to a standard 12-hour light/dark cycle analyzed at P27. LDR, mice reared in darkness between P20 and P27. LDR+10, mice reared in the dark between P20 and P27 then acutely re-exposed to light for ten hours. Scale bar, 10 µm. (C) Quantification of the distance of the OPC:microglia contacts from the center of the OPC soma. One-way ANOVA ( $p < 0.05$ ) with Tukey's post-hoc test;  $n$  (OPC): P27 = 20, LDR = 30, LDR+10 = 47, from 3 mice per group. (D) Reconstructions of OPCs (green) and engulfed TC inputs (magenta) in mice at P27 following depletion of microglia between P20 and P27 via PLX5622 (or control chow) administration. Scale bar, 2 µm. (E) Quantification of the volume of synaptic material contained within each OPC in the presence or absence of microglia. Mann-Whitney t-test;  $p < 0.01$ ;  $n$  (OPC): Control = 26, PLX = 42 from 3 mice per group. (F) Reconstruction of OPCs (green) and synaptic inputs (magenta) as shown in (D) from dark-reared (LDR) and visually stimulated (LDR+10) mice. Scale bar, 2 µm. (G) Quantification of synaptic engulfment as shown in (E) in LDR and LDR+10 mice containing or lacking microglia. Two-Way ANOVA (Stimulation:  $p < 0.0001$ ; Microglia:  $p < 0.05$ ; Interaction between stimulation and microglia:  $p < 0.05$ );  $n$  (OPCs, Control/PLX): LDR = 45/52, LDR+10 = 51/54 from 3 mice per group. (C), (E), and (G), Bars represent mean  $\pm$  SEM. \* $p < 0.05$ , \*\* $p < 0.01$ , \*\*\* $p < 0.001$ , \*\*\*\* $p < 0.0001$ .

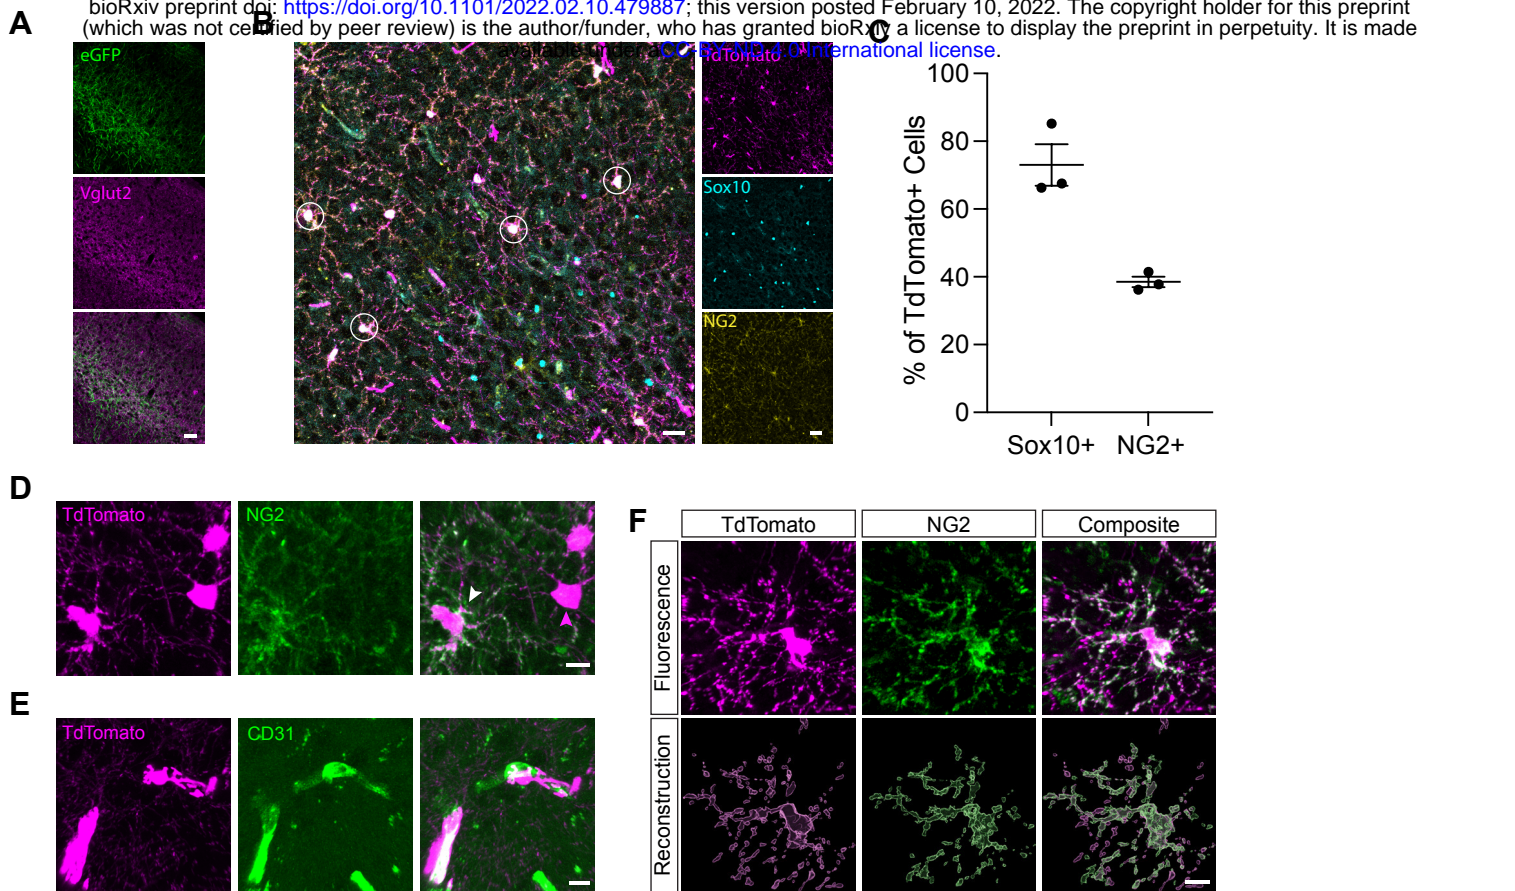

**Extended Data Figure 1. Validation of the OPC reporter line.** (A) Confocal images of TC axons and inputs in V1 labeled with AAV-hSYN-eGFP (green) and immunostained for Vglut2 (magenta). Scale bar, 40  $\mu$ m. (B) Representative image of TdTomato+ cells (magenta) in the NG2-CreER<sup>T2</sup>; TdTomato mouse line. Cells of the oligodendrocyte lineage immunostained for Sox10 (green) and the OPC marker NG2 (yellow). White circles, OPCs confirmed by co-expression of TdTomato and NG2. Scale bar, 20  $\mu$ m. Scale bar fluorescence, 40  $\mu$ m. (C) Quantification of the percentages of TdTomato+ cells that co-stain for Sox10 and NG2. Individual data points and mean  $\pm$  SEM shown; n = 3 mice per group. (D) Higher resolution images of TdTomato+ cells (magenta) immunostained for NG2 (green). White arrow, confirmed OPC in which TdTomato and NG2 signal overlap. Compared to other Sox10+ cells, OPCs can be distinguished by their bean-shaped somata. Scale bar, 10  $\mu$ m. (E) Confocal images of rare TdTomato+ cells (magenta) co-localizing with blood vessels (CD31, green). These are likely pericytes and are easy to distinguish from OPCs based upon morphology. Scale bar, 10  $\mu$ m. (F) High magnification image of a TdTomato+ OPC (magenta) immunostained for NG2 (green). Bottom, volumetric reconstructions of the same cell based upon TdTomato versus NG2 signal, demonstrating a high level of overlap between the two OPC markers. Scale bar, 10  $\mu$ m.



**A**

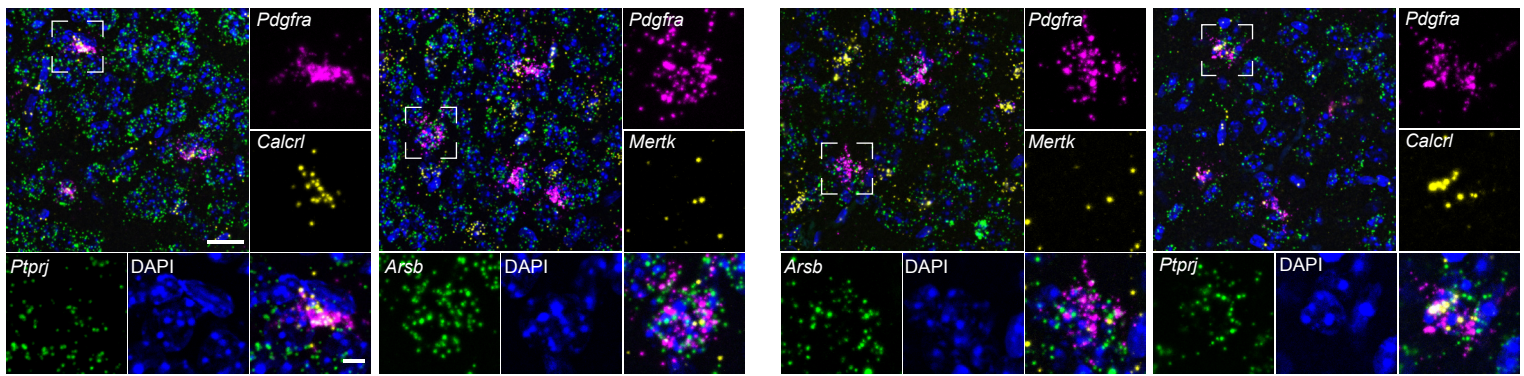

**C**

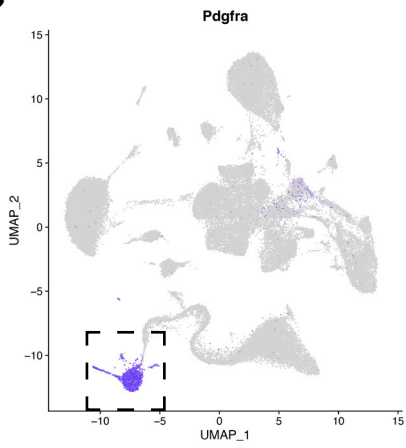

**D**

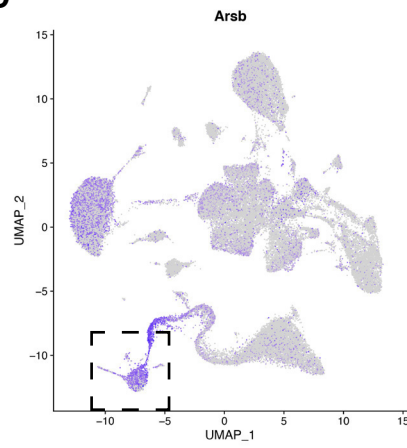

**E**

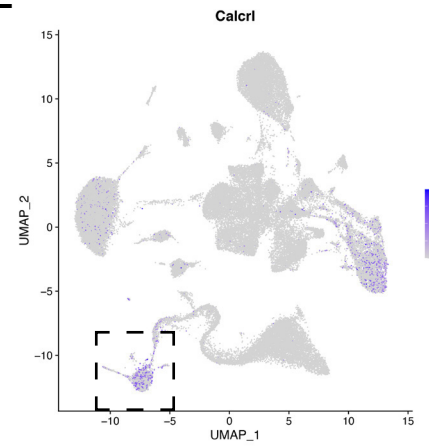

**F**

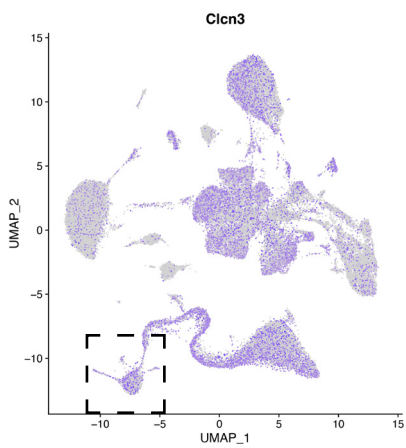

**G**

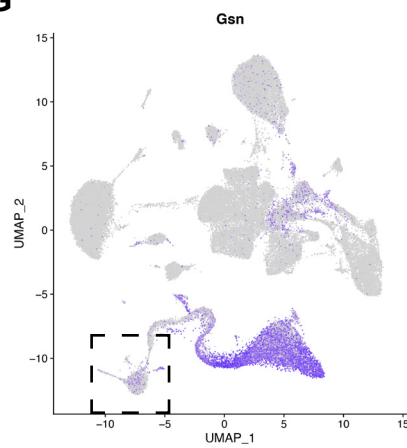

**H**

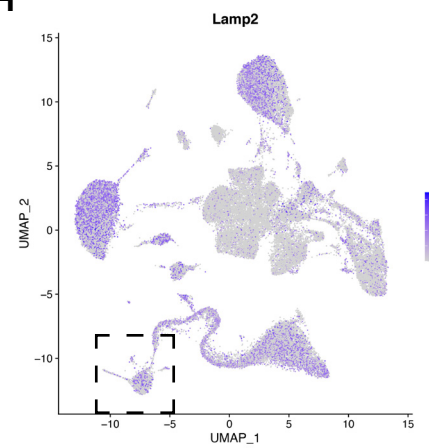

**I**

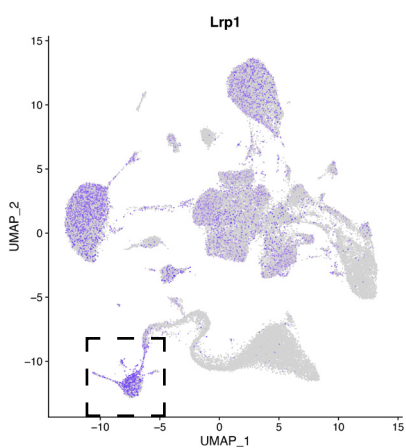

**J**

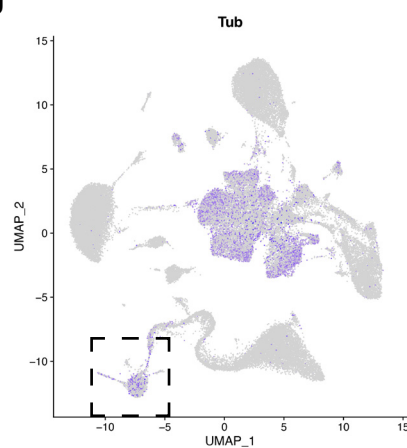

**K**

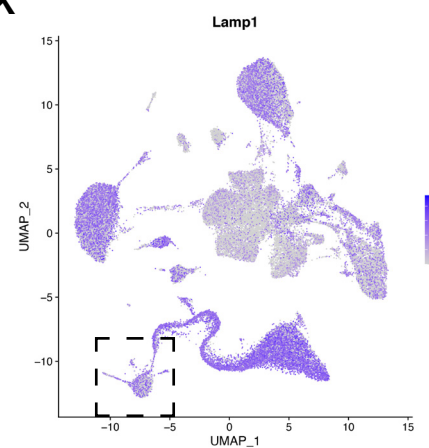

### **Extended Data Figure 2. Expression of engulfment-related genes in OPCs.**

Confocal images of V1 sections subjected to fluorescence *in situ* hybridization (RNAscope) and probed for the OPC marker gene *Pdgfra* (magenta) along with genes that encode known regulators of phagocytic engulfment and lysosomal function: *Ptprj* (green), *Calcr1* (yellow), *Arsb* (green), and *Mertk* (yellow). DAPI shown in blue. (A) P27; (B) P90. Scale bar, 20  $\mu\text{m}$ . Inset scale bar, 5  $\mu\text{m}$ . (C) – (K) UMAPs demonstrating engulfment-related gene expression (taken from PANTHER gene ontology term list, “phagocytosis”) across all clusters in dataset from Hrvatin, *et al*, 2018. Gene name given above graph. Square, OPC cluster.

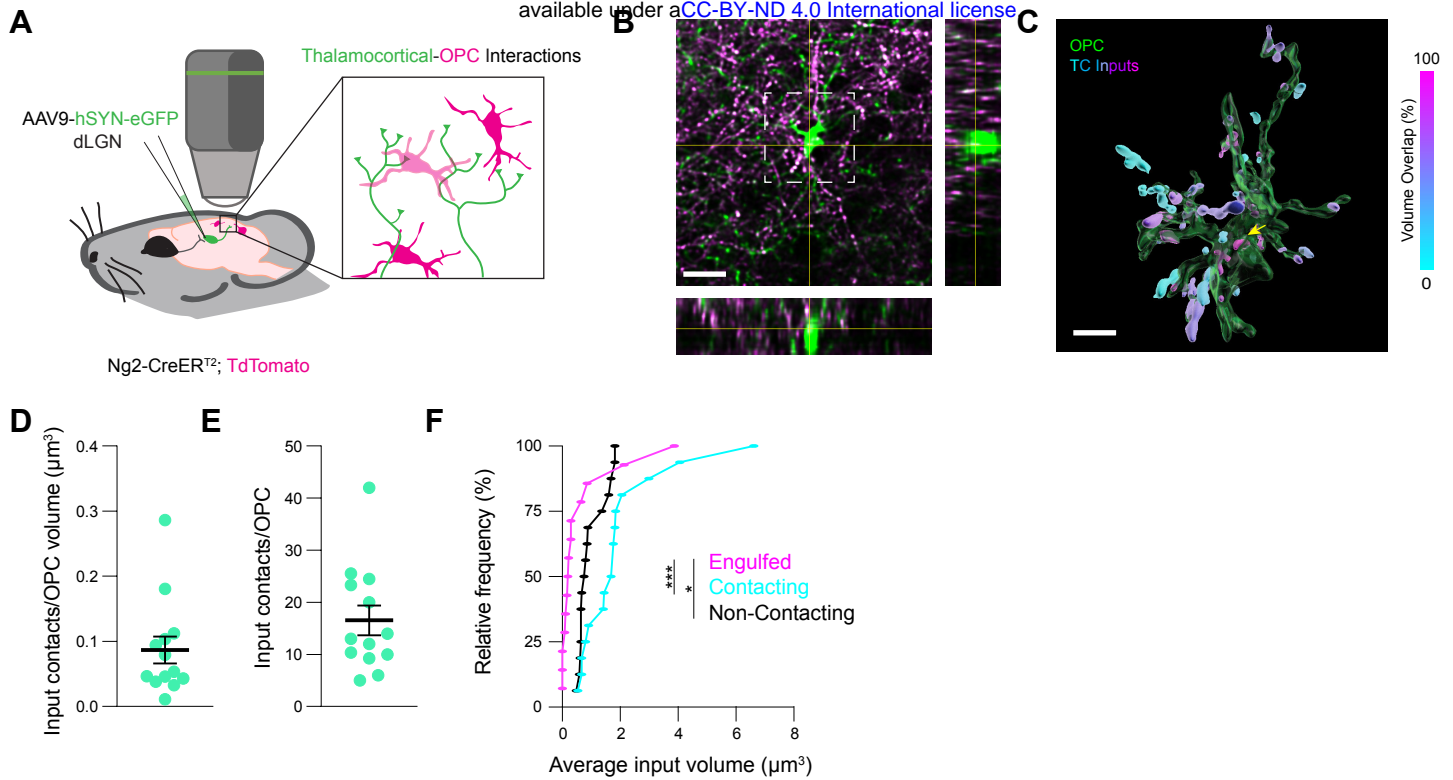

**Extended Data Figure 3. *In vivo* two-photon imaging of OPC-synapse interactions.** (A) Schematic demonstrating the viral labeling of thalamocortical (TC) axons with AAV9-hSYN-eGFP in NG2-CreER<sup>T2</sup>; TdTomato mice and the live-imaging paradigm. (B) Maximum projection of a Z-stack of V1 in an awake mouse taken on a two-photon microscope (reconstructed in Fig. 1I). OPC, green. Inputs, magenta. Orthogonal projections on bottom and to the right. Scale bar, 20  $\mu\text{m}$ . (C) Volumetric reconstruction of the OPC from (B) (green) with inputs colored based upon their overlap with OPC signal. Yellow arrow, completely internalized input. Scale bar, 10  $\mu\text{m}$ . (D) The number of TC inputs contacting an OPC normalized to OPC volume. (E) The number of TC inputs contacting an OPC. (F) Cumulative frequencies of average input size categorized by contact or engulfment by OPCs. Kruskal-Wallis test with Dunn's post-hoc comparisons, \*\*\* $p < 0.001$ , \* $p < 0.05$ . For all data  $n = 15-17$  volumes from 5 mice.



A

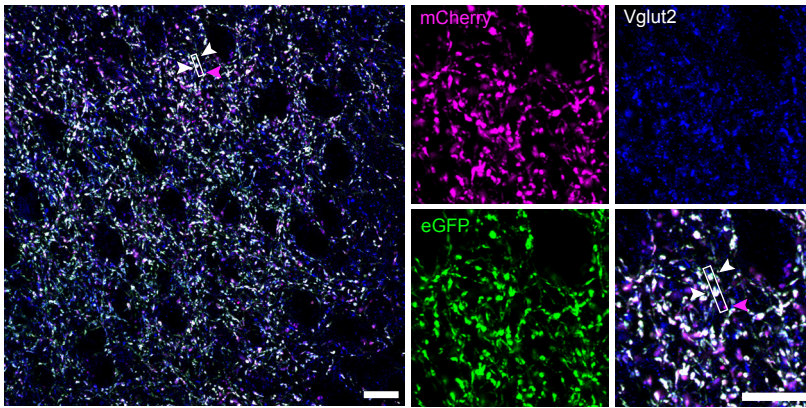

B

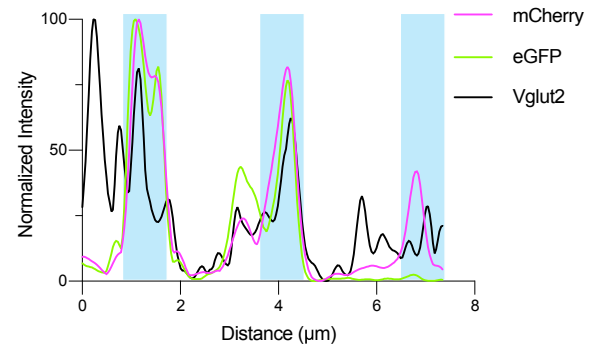

C

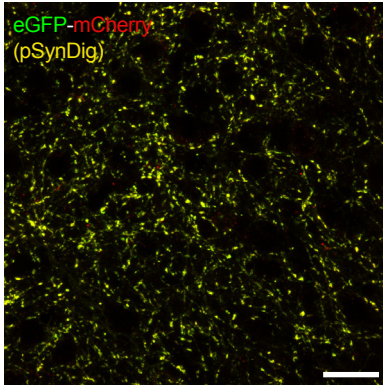

D

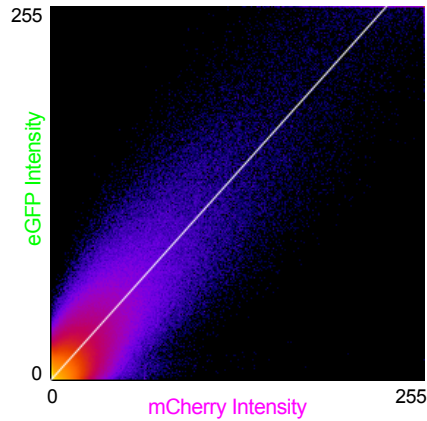

E

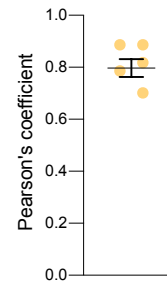

**Extended Data Figure 4. Validation of pSynDig as a marker of synaptic inputs.** (A) Confocal image of layer 4 of V1 following viral infection of the dorsal lateral geniculate nucleus (dLGN) with AAV5-hSYN-pSynDig. Most pSynDig<sup>+</sup> inputs show tight colocalization between mCherry (magenta) and eGFP (green) signal overlapping with the input marker Vglut2 (blue). White box, example region quantified in (B). White arrows, inputs that are positive for both mCherry and eGFP. Magenta arrow, input that is only positive for mCherry. Scale bar, 10  $\mu\text{m}$ . Inset scale bar, 10  $\mu\text{m}$ . (B) Quantification of fluorescence intensity across the line scan denoted by the white box in (A) for each channel separately, normalized to each channel's respective maximum intensity. Note the high degree of overlap between mCherry and eGFP signal in the first two blue bars and mCherry alone in the last bar. Also note the presence of a Vglut2<sup>+</sup> synapse represented by the black peak that precedes the first blue bar, which is likely derived from a dLGN neuron that was not infected with the pSynDig virus. (C) Confocal image of pSynDig<sup>+</sup> inputs in V1. Scale bar, 20  $\mu\text{m}$ . (D) Quantification of fluorescence intensities of eGFP and mCherry across the imaging frame shows a high degree of colocalization. (E) Quantification of Pearson's coefficient describing the colocalization of mCherry and eGFP signal at inputs expressing pSynDig. Individual data points with mean  $\pm$  SEM.  $n = 5$  images/3 mice.

A

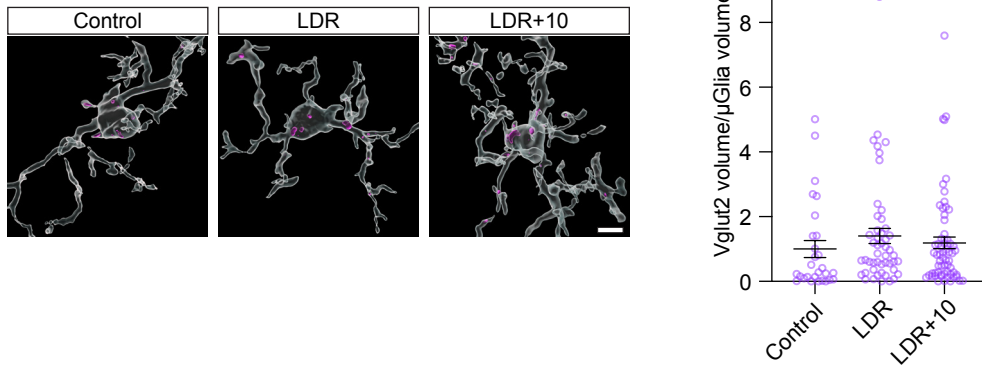

**Extended Data Figure 5. Synapse engulfment by microglia is not sensitive to robust changes in sensory experience.** (A) Volumetric reconstructions of microglia immunostained for Iba1 (white) and engulfed Vglut2+ inputs (magenta) in normally reared mice at P27, mice dark-reared between P20 and P27 (LDR), and mice re-exposed to light for 10 hours following LDR (LDR+10). Scale bar, 2 μm. (B) Quantification of the volume of synaptic material within microglia of each condition. One-way ANOVA ( $p > 0.05$ ) with Tukey's post-hoc test; n (microglia): P27 = 28, LDR = 49, LDR+10 = 64, from 3 mice per group.

**A**

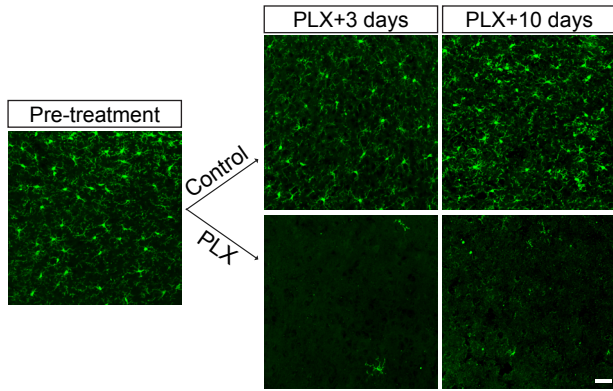

**Bi**

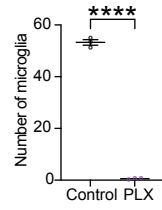

**Bii**

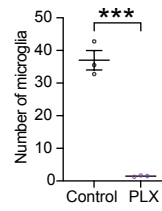

**Extended Data Figure 6. Validation of microglial depletion using PLX5622.** (A) Representative confocal images of microglia immunostained for Iba1 (green) in the visual cortex before and during PLX5622 administration. Scale bar, 20  $\mu$ m. (B) Quantification of the number of microglia in V1 averaged across three mice per condition. (Bi) Three days of PLX5622 administration. (Bii) Ten days of PLX5622 administration. Individual data points with mean  $\pm$  SEM. Unpaired t-test; three days, \*\*\*\* $p < 0.0001$ ; ten days, \*\*\* $p < 0.001$ .  $n = 3$  mice per group.

**A**

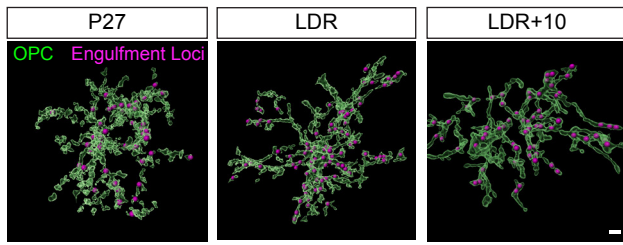

**B**

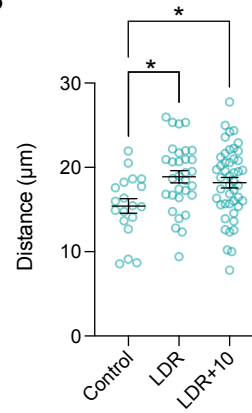

**C**

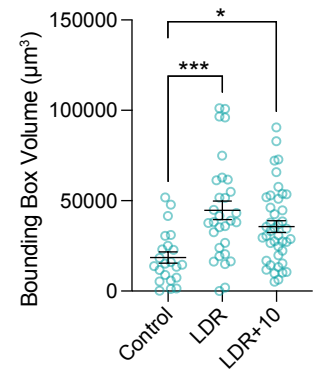

**Extended Data Figure 7. Distribution of engulfment loci across OPCs is regulated by sensory experience.** (A) Reconstructions of OPCs (green) and engulfed TC inputs (magenta) illustrating experience-dependent changes in the distribution of points of engulfment across the OPC arbor. Scale bar, 3 μm. (B) Quantification of the distance between the center of the OPC soma and loci at which engulfed inputs reside. One-way ANOVA ( $p < 0.005$ ) with Tukey's post-hoc test; n (OPC): P27 = 19, LDR = 31, LDR+10 = 46, from 3 mice per group. (C) Estimated range of synaptic surveillance by a given OPC based upon the bounding box volume calculated from the distribution of engulfment loci as quantified in (B). One-way ANOVA ( $p < 0.0005$ ) with Tukey's post-hoc test; n (OPC): P27 = 22, LDR = 30, LDR+10 = 42, from 3 mice per group. (B) and (C) Individual data points with mean  $\pm$  SEM. \* $p < 0.05$ , \*\*\* $p < 0.001$ .
